# Supplementary material for: Autoxidation of terpenes, a common pathway in tropospheric and low temperature combustion conditions: the case of limonene and α-pinene
Source: Copernicus journal article supplement (doi:10.5194/acp-2021-964), 2021-12-02
Supplement: Supplementary file 1 [file acp-2021-964-supplement.zip]

2 **Autoxidation of terpenes, a common pathway in tropospheric and low**  
 3 **temperature combustion conditions: the case of limonene and  $\alpha$ -**  
 4 **pinene.**

7 Fig. S1, Van Krevelen diagram, with the DBE in the third dimension, showing specific and common chemical formulae  
 8 detected after to oxidation of limonene by ozonolysis and combustion.

9 S2, file containing all the data from the combustion (cool flame combustion at 590 K) presented in this article

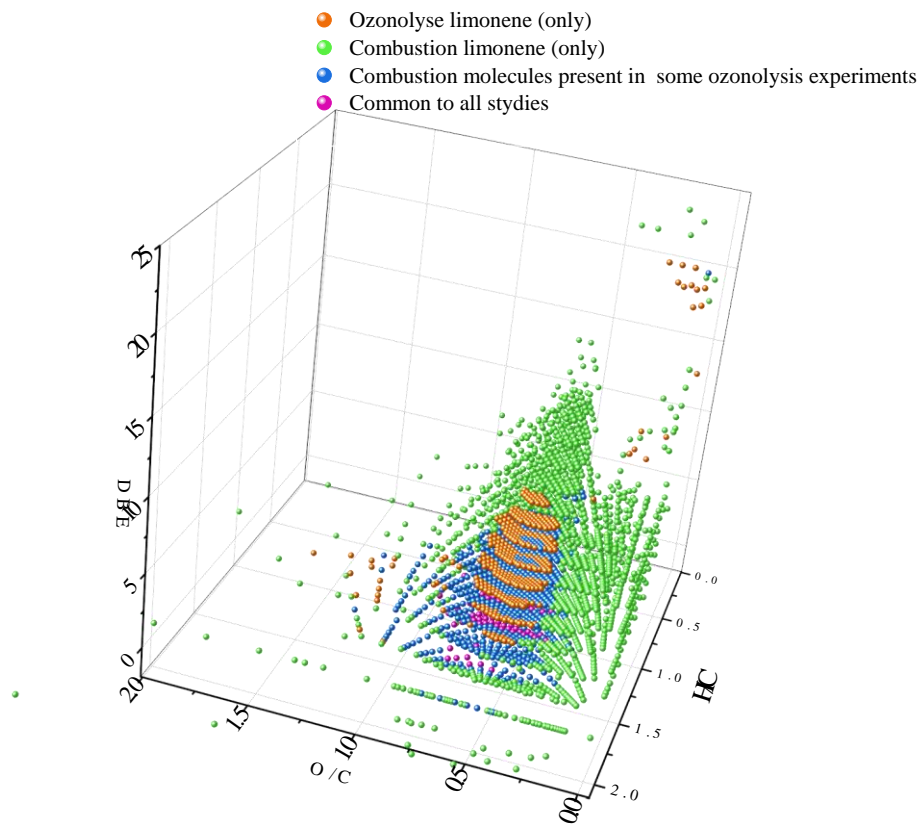

1 **SI Figure 1.** Van Krevelen diagram, with the DBE in the third dimension, showing specific and common chemical formulae  
2 detected after to oxidation of limonene by ozonolysis and combustion.

3  
4

5 **SI 2 :Excel data file**

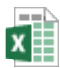

Data S2  
exemple.xlsx

6  
7
