# Supplementary material for: Autoxidation of terpenes, a common pathway in tropospheric and low temperature combustion conditions: the case of limonene and α-pinene
Source: Copernicus journal article supplement (doi:10.5194/acp-2021-964), 2021-12-02
Supplement: Supplementary file 1 [file Supplement Autoxidation of terpenes, a common pathway... Soumission ACP 191121 Data S2.xlsx]

## Sheet: Alpha Pinene APCI
APCI+	APCI-
C9H16O0	C16H22O4
C8H12O0	C14H18O4
C4H6O0	C7H8O4
C15H24O0	C12H20O4
C15H18O0	C9H14O3
C14H22O0	C7H12O2
C17H24O0	C6H10O3
C29H24O0	C14H24O2
C12H16O0	C9H18O4
C16H24O0	C13H16O3
C10H18O0	C14H16O3
C13H14O0	C12H18O2
C20H30O0	C18H26O4
C5H8O0	C20H26O3
C13H16O0	C14H20O4
C16H20O0	C7H8O3
C10H10O0	C8H10O4
C5H6O0	C13H18O4
C16H18O0	C18H28O4
C14H20O0	C15H26O4
C14H14O0	C12H14O2
C11H14O0	C13H14O4
C13H22O0	C11H18O3
C8H14O0	C8H14O4
C16H22O0	C10H14O4
C19H30O0	C9H8O3
C18H24O0	C11H18O4
C7H6O0	C12H22O4
C6H6O0	C5H4O2
C20H32O0	C13H12O4
C7H12O0	C14H22O4
C17H26O0	C12H24O2
C11H16O0	C6H4O4
C12H18O0	C17H34O2
C8H10O0	C9H14O2
C4H4O0	C12H18O3
C7H10O0	C11H20O4
C9H10O0	C12H12O4
C12H14O0	C5H4O4
C7H8O0	C17H24O3
C14H18O0	C4H8O2
C6H10O0	C13H22O2
C9H14O0	C9H16O4
C19H26O0	C10H10O3
C15H20O0	C6H10O4
C6H8O0	C12H12O2
C9H8O0	C8H8O3
C15H22O0	C9H14O4
C20H28O0	C9H12O4
C26H34O0	C8H12O4
C4H8O0	C13H20O4
C8H8O0	C13H16O4
C13H20O0	C6H6O3
C5H10O0	C5H6O3
C11H12O0	C12H12O3
C10H12O0	C4H4O3
C9H12O0	C6H8O5
C18H26O0	C8H14O2
C10H16O0	C10H20O5
C13H18O0	C3H4O2
C19H28O0	C15H22O5
C10H14O0	C7H8O5
C9H6O0	C13H26O2
C16H26O0	C19H28O2
C26H16O0	C17H32O2
C19H34O8	C10H16O4
C17H22O7	C10H18O4
C3H4O1	C20H36O4
C10H18O1	C6H12O4
C9H18O1	C8H6O4
C17H30O7	C14H16O4
C20H32O1	C10H10O2
C17H24O7	C11H14O5
C18H32O7	C10H16O5
C17H26O1	C9H8O5
C16H22O1	C17H34O5
C12H18O1	C6H6O4
C18H30O7	C20H38O4
C11H10O1	C8H6O2
C7H10O1	C13H22O4
C13H22O1	C10H8O5
C3H6O1	C10H14O2
C18H34O7	C10H20O4
C13H10O1	C12H20O2
C15H22O7	C8H4O4
C5H4O1	C9H10O2
C17H26O7	C4H8O4
C4H4O1	C10H16O2
C10H12O1	C14H18O5
C20H26O1	C11H16O5
C19H30O1	C4H4O5
C15H18O1	C12H18O4
C15H26O1	C12H20O5
C14H14O1	C8H16O2
C19H28O7	C19H28O4
C5H6O1	C20H28O2
C19H30O7	C11H20O5
C10H14O1	C5H10O2
C16H30O7	C10H8O4
C19H36O7	C14H24O5
C12H18O6	C8H8O2
C15H22O1	C12H14O4
C16H20O1	C19H32O5
C8H14O1	C5H8O4
C16H28O6	C17H28O4
C11H16O6	C8H10O2
C13H20O1	C8H10O5
C21H32O6	C17H24O2
C15H20O1	C19H26O2
C18H26O1	C12H16O4
C5H8O1	C18H36O2
C11H14O1	C9H6O2
C9H12O1	C15H26O2
C13H16O1	C3H4O4
C14H24O1	C5H4O5
C11H20O1	C15H24O5
C12H16O1	C15H22O2
C13H14O1	C7H14O4
C18H26O6	C13H18O3
C8H8O1	C9H10O4
C22H40O6	C17H24O5
C14H22O1	C19H24O5
C17H24O1	C14H22O5
C9H16O1	C7H10O2
C20H28O1	C9H6O4
C14H20O6	C17H26O2
C14H20O1	C9H8O4
C6H12O1	C6H4O5
C18H24O6	C8H8O4
C6H14O1	C20H34O4
C11H16O1	C14H20O5
C8H12O1	C15H20O4
C7H6O1	C15H30O2
C10H16O6	C7H4O5
C13H20O6	C12H22O2
C10H16O1	C15H20O5
C5H10O1	C13H16O2
C15H20O6	C9H10O3
C10H20O1	C7H10O3
C8H12O6	C7H14O2
C15H22O6	C10H10O5
C20H30O1	C7H6O5
C9H14O1	C2H4O3
C20H26O6	C7H8O1
C9H10O1	C16H18O5
C30H44O1	C13H18O1
C17H22O1	C8H14O1
C19H28O6	C16H32O2
C18H28O6	C4H6O2
C17H30O6	C4H8O3
C18H28O1	C10H18O5
C11H18O1	C10H16O3
C4H8O1	C7H4O3
C9H8O1	C5H6O5
C3H8O1	C30H10O5
C14H16O1	C15H16O5
C7H8O1	C10H14O1
C12H14O1	C4H4O1
C6H6O1	C19H26O3
C19H26O1	C4H6O5
C9H12O6	C8H12O5
C4H6O1	C14H26O3
C16H26O1	C10H12O3
C10H18O5	C29H6O5
C7H12O1	C11H22O2
C11H12O1	C12H18O5
C16H24O1	C10H20O3
C6H8O1	C13H22O3
C8H18O1	C8H6O5
C10H8O1	C17H28O5
C18H28O5	C14H20O3
C18H24O1	C8H12O1
C14H18O1	C13H16O5
C13H18O1	C13H14O3
C3H2O1	C11H10O3
C8H16O1	C14H22O3
C14H18O5	C15H22O3
C18H30O5	C11H8O5
C15H24O1	C18H28O5
C10H8O5	C17H32O5
C6H10O1	C13H12O5
C10H10O1	C9H16O5
C21H32O5	C10H14O5
C13H20O5	C18H30O5
C20H32O5	C17H26O5
C8H10O1	C20H26O5
C19H26O2	C17H30O5
C6H6O2	C6H12O5
C19H28O2	C10H12O5
C6H8O2	C15H28O5
C20H32O2	C6H10O5
C14H22O2	C25H48O5
C16H30O2	C12H14O1
C4H4O2	C13H22O5
C12H12O2	C8H8O5
C10H10O5	C5H8O5
C16H22O5	C7H10O5
C3H4O2	C9H12O5
C11H16O2	C7H12O5
C5H8O2	C9H16O1
C17H30O5	C16H24O1
C11H18O5	C16H28O6
C7H10O5	C21H34O6
C16H26O2	C17H28O6
C9H18O5	C12H16O5
C17H24O5	C4H6O6
C11H14O2	C19H28O6
C17H20O2	C18H30O6
C18H30O2	C21H42O6
C9H10O2	C18H22O6
C20H34O2	C9H16O6
C9H14O5	C6H8O6
C13H16O2	C13H20O5
C17H24O2	C8H8O6
C8H12O5	C7H6O6
C12H20O5	C8H12O6
C15H28O2	C5H10O6
C9H12O5	C20H34O5
C16H20O5	C17H30O6
C14H16O2	C6H6O5
C20H36O2	C13H16O6
C18H24O2	C10H12O6
C17H32O2	C13H24O6
C15H18O2	C10H18O6
C20H36O5	C19H36O6
C15H20O5	C29H50O5
C4H6O2	C6H6O6
C13H18O5	C9H12O6
C8H14O5	C9H10O6
C7H10O2	C9H14O5
C13H18O4	C11H10O5
C20H30O4	C15H26O6
C13H20O2	C16H22O5
C14H20O2	C11H18O6
C10H8O2	C9H10O5
C10H14O2	C13H18O6
C10H10O2	C8H14O5
C15H22O2	C8H10O1
C15H20O2	C12H18O6
C8H16O4	C6H6O1
C18H30O4	C17H24O1
C9H16O4	C14H18O6
C17H28O2	C11H16O2
C6H8O4	C11H16O6
C3H2O2	C13H18O5
C7H8O4	C12H14O5
C15H24O2	C18H26O6
C19H32O4	C9H10O1
C11H16O4	C11H12O5
C3H6O2	C11H18O5
C17H26O4	C11H16O1
C5H10O2	C7H12O6
C18H26O4	C9H8O6
C21H32O4	C7H8O6
C5H4O2	C8H16O1
C2H4O2	C12H12O5
C16H22O4	C4H6O1
C13H22O4	C13H12O6
C13H20O4	C12H22O5
C24H16O2	C10H20O6
C10H16O4	C15H20O6
C13H24O2	C12H20O6
C17H20O4	C14H14O6
C8H10O4	C8H10O6
C16H24O2	C11H20O6
C18H24O4	C10H20O2
C17H24O4	C14H20O6
C15H24O4	C17H24O6
C9H16O2	C7H12O1
C6H10O2	C5H8O1
C16H22O2	C19H30O4
C18H26O2	C11H14O6
C11H18O2	C9H14O6
C30H46O4	C15H22O4
C19H30O4	C11H12O4
C14H24O4	C11H16O4
C15H22O4	C11H20O1
C29H50O4	C18H24O6
C4H8O2	C14H24O6
C7H6O2	C4H4O2
C8H8O2	C12H14O6
C17H26O2	C10H6O4
C11H10O2	C19H24O6
C8H10O2	C10H16O1
C14H20O4	C12H22O6
C15H26O2	C13H22O6
C20H26O2	C11H22O6
C13H16O4	C14H22O6
C18H28O4	C10H14O6
C4H10O2	C10H10O6
C21H40O2	C15H22O6
C13H22O2	C8H14O6
C12H18O2	C10H16O6
C6H12O2	C12H16O6
C22H32O4	C2H4O4
C18H28O2	C10H10O4
C17H32O4	C17H26O4
C7H14O2	C17H22O6
C7H8O2	C11H20O2
C12H16O2	C6H10O1
C14H26O2	C3H6O4
C10H18O4	C9H14O1
C7H12O2	C9H18O2
C10H20O2	C12H24O6
C13H24O4	C7H10O6
C12H14O4	C19H32O6
C9H8O2	C12H16O2
C20H30O3	C16H24O2
C16H24O3	C13H20O6
C7H6O3	C16H20O2
C19H30O3	C9H16O2
C16H20O3	C8H12O2
C16H28O2	C15H16O4
C30H46O2	C7H12O4
C19H32O3	C10H12O4
C13H18O2	C17H24O4
C4H8O3	C7H10O1
C9H6O3	C17H22O4
C12H14O2	C5H10O1
C20H28O2	C10H12O1
C23H36O2	C20H32O2
C5H8O3	C7H4O4
C12H20O2	C6H8O4
C18H26O3	C6H8O1
C8H8O3	C14H22O1
C8H16O3	C4H8O1
C8H12O2	C19H30O7
C12H22O2	C19H36O7
C16H20O2	C18H24O4
C11H12O2	C12H22O7
C20H26O3	C16H26O7
C18H24O3	C10H18O7
C14H24O3	C9H12O1
C14H16O3	C11H18O7
C13H12O2	C16H30O2
C13H24O3	C5H6O1
C15H20O3	C6H8O2
C17H24O3	C9H12O7
C8H4O3	C5H6O4
C20H30O2	C19H24O7
C5H10O3	C11H10O2
C13H14O2	C5H10O4
C10H16O2	C16H30O7
C4H10O3	C9H14O7
C11H20O2	C10H16O7
C8H14O2	C11H10O4
C10H12O2	C12H10O4
C10H18O2	C19H32O7
C9H14O2	C15H18O7
C5H6O2	C20H34O7
C9H16O3	C11H16O7
C9H12O2	C20H30O7
C17H22O2	C11H14O4
C8H12O3	C18H22O7
C29H48O3	C10H14O7
C23H36O3	C3H6O1
C19H28O3	C17H14O7
C13H12O3	C4H6O4
C12H14O3	C13H16O1
C14H18O2	C12H18O7
C15H18O3	C15H18O2
C12H20O3	C19H26O7
C6H6O3	C8H8O1
C10H14O3	C18H24O7
C6H12O3	C5H8O2
C20H28O3	C4H8O7
C20H38O3	C7H6O4
C15H28O3	C19H26O4
C10H18O3	C20H26O7
C7H8O3	C7H10O4
C17H20O3	C18H28O1
C4H6O3	C6H12O2
C20H34O3	C11H20O7
C6H10O3	C19H24O4
C15H24O3	C14H20O7
C8H14O3	C9H12O2
C13H16O3	C3H4O1
C12H10O3	C10H20O7
C14H18O3	C9H18O1
C11H18O3	C7H8O2
C8H18O3	C10H18O1
C7H14O3	C17H32O7
C12H16O3	C12H20O7
C23H40O3	C3H6O3
C17H26O3	C16H28O7
C10H12O3	C10H12O7
C14H20O3	C10H12O2
C19H38O3	C18H18O7
C6H8O3	C5H4O3
C18H28O3	C17H28O7
C20H36O3	C10H10O1
C20H26O5	C20H36O7
C16H28O15	C13H18O8
C8H18O15	C18H26O8
C9H12O3	C17H24O8
C19H28O5	C15H24O1
C14H20O15	C5H6O2
C15H24O15	C12H20O3
C19H32O5	C18H24O8
C15H22O3	C11H20O8
C30H36O15	C20H34O8
C10H8O3	C13H16O8
C30H34O14	C11H20O3
C12H22O14	C13H20O2
C20H30O5	C20H32O8
C16H26O5	C18H28O8
C23H38O5	C7H6O3
C19H26O3	C19H28O8
C30H30O13	C20H28O3
C12H20O13	C12H16O3
C9H8O4	C20H26O2
C23H2O3	C7H6O2
C11H16O13	C16H12O8
C14H14O3	C6H6O2
C9H14O3	C8H6O3
C20H30O13	C14H24O3
C19H26O13	C14H20O8
C9H16O5	C15H18O8
C20H30O12	C15H26O8
C14H26O6	C14H26O2
C11H16O3	C3H8O2
C10H18O11	C15H24O8
C11H14O3	C2H4O2
C13H14O3	C17H28O8
C19H28O11	C11H14O2
C9H14O11	C21H32O8
C20H30O11	C10H18O2
C11H20O10	C15H26O3
C17H34O10	C23H32O2
C19H30O10	C14H24O8
C11H20O3	C6H8O3
C20H32O10	C9H18O3
C9H12O10	C13H14O2
C14H22O4	C16H20O8
C16H18O3	C11H8O3
C10H16O10	C6H12O3
C19H28O10	C19H30O8
C17H32O5	C13H20O3
C12H22O3	C9H8O2
C20H30O10	C18H36O8
C18H28O10	C17H26O3
C29H52O5	C14H28O2
C13H20O3	C11H12O2
C16H22O6	C7H14O9
C20H28O9	C12H14O3
C16H24O9	C11H16O3
C18H26O9	C6H10O2
C20H30O9	C3H6O2
C19H28O9	C14H18O9
C12H12O3	C13H18O2
C15H24O5	C10H8O3
C19H36O9	C5H10O3
C19H30O9	C16H30O3
C17H36O9	C15H20O3
C18H28O9	C15H28O9
C13H24O5	C6H10O9
C17H34O9	C16H22O3
C20H32O9	C9H12O3
C11H12O3	C20H32O10
C17H30O8	C20H34O3
C9H8O3	C12H10O3
C12H14O5	C5H8O10
C18H28O8	C19H28O3
C13H22O3	C14H18O3
C14H22O3	C8H16O3
C19H36O8	C11H12O3
C15H26O3	C15H24O3
C12H18O5	C10H18O3
C7H12O3	C11H14O3
C14H26O3	C18H26O3
C8H10O3	C5H8O3
C16H22O8	C22H22O12
C16H30O8	C7H14O3
C20H38O5	C8H14O12
C18H36O8	C10H14O3
C17H36O8	C15H18O3
C17H22O3	C3H4O3
C20H28O8	C22H24O13
C10H12O4	C14H12O3
C16H22O3	C9H6O3
C19H28O8	C21H20O13
C10H10O3	C29H26O14
C17H34O8	C11H18O14
C19H30O8	C8H14O3
C21H30O5	C4H6O3
C16H26O8	C8H12O3
C18H24O5	C9H12O15
C17H26O8	C7H12O3
C10H16O3	C6H4O3
C16H20O7	C10H16O15
C18H24O8	C9H16O3
C18H34O8	C8H10O3
C20H34O7	C4H4O4
C9H10O3
C11H10O3
C7H10O3
C10H22O6
C18H26O7
C19H38O8
C13H18O3
C16H24O8
C21H32O8
C21H34O5
C15H22O8
C17H24O8
C7H12O8
C15H32O8
C10H20O3
C15H18O5
C17H32O8
C20H34O5
C17H22O5
C16H32O8
C17H28O3
C12H18O3
C5H6O3
C17H28O8
C10H20O5
C12H22O5
C17H26O5
C15H16O3
C11H12O5
C20H34O8
C19H26O8
C20H32O3
C5H8O5
C20H28O5
C10H12O6
C16H30O3
C16H20O6
C11H14O5
C11H14O6
C19H30O5
C16H32O7
C18H32O5
C16H22O7
C9H12O4
C10H12O5
C10H14O7
C21H34O6
C15H30O3
C19H32O6
C7H8O5
C15H18O4
C20H28O4
C16H28O7
C11H14O4
C13H12O4
C20H8O5
C18H30O6
C16H24O6
C16H30O4
C15H20O4
C17H32O7
C15H22O5
C16H24O7
C19H30O6
C16H24O4
C19H26O7
C12H22O4
C17H28O4
C9H10O5
C20H30O7
C14H22O6
C20H28O7
C19H26O6
C10H10O4
C20H34O4
C21H30O4
C29H56O15
C20H26O4
C14H28O6
C14H18O6
C12H16O4
C21H34O7
C15H18O6
C12H20O6
C12H14O6
C20H32O4
C7H10O4
C9H14O6
C16H30O6
C10H14O6
C15H30O6
C20H32O7
C12H20O4
C7H12O4
C14H20O5
C16H24O5
C9H14O4
C12H16O5
C11H18O4
C18H34O6
C18H28O7
C12H18O4
C22H2O4
C15H32O7
C16H18O4
C13H16O6
C19H38O6
C15H28O7
C17H34O7
C15H26O7
C13H26O5
C22H42O7
C16H26O6
C17H32O6
C11H24O6
C17H28O7
C18H36O6
C6H10O4
C17H22O4
C22H42O4
C13H22O5
C24H38O4
C24H36O6
C10H20O6
C19H28O4
C10H14O5
C15H30O7
C20H32O6
C12H16O6
C10H18O6
C10H16O5
C18H26O5
C17H26O6
C9H10O4
C20H22O5
C12H22O6
C14H16O5
C20H34O6
C5H10O6
C11H16O5
C13H28O6
C8H14O4
C21H34O4
C19H26O4
C13H14O4
C11H12O4
C15H16O4
C17H20O6
C10H14O4
C20H30O6
C8H12O4
C17H24O6
C15H28O6

## Sheet: Alpha Pinene HESI
HESI+	HESI-
C10H0O13	C10H10O0
C10H10O0	C10H10O1
C10H10O1	C10H10O2
C10H10O2	C10H10O3
C10H10O3	C10H10O4
C10H10O4	C10H10O5
C10H12O0	C10H10O6
C10H12O1	C10H10O7
C10H12O2	C10H10O8
C10H12O3	C10H12O0
C10H12O4	C10H12O1
C10H12O5	C10H12O2
C10H12O6	C10H12O3
C10H14O0	C10H12O4
C10H14O1	C10H12O5
C10H14O2	C10H12O6
C10H14O3	C10H12O7
C10H14O4	C10H12O8
C10H14O5	C10H14O0
C10H14O6	C10H14O1
C10H16O0	C10H14O2
C10H16O1	C10H14O3
C10H16O10	C10H14O4
C10H16O2	C10H14O5
C10H16O3	C10H14O6
C10H16O4	C10H14O7
C10H16O5	C10H14O8
C10H16O6	C10H16O0
C10H18O1	C10H16O1
C10H18O11	C10H16O2
C10H18O2	C10H16O3
C10H18O3	C10H16O4
C10H18O4	C10H16O5
C10H18O5	C10H16O6
C10H18O6	C10H16O7
C10H8O0	C10H18O0
C10H8O1	C10H18O1
C10H8O2	C10H18O10
C10H8O3	C10H18O2
C11H10O1	C10H18O3
C11H12O0	C10H18O4
C11H12O1	C10H18O5
C11H12O2	C10H18O6
C11H12O3	C10H20O1
C11H12O4	C10H20O11
C11H14O0	C10H20O2
C11H14O1	C10H20O3
C11H14O2	C10H20O4
C11H14O3	C10H20O5
C11H14O4	C10H2O13
C11H14O5	C10H2O7
C11H16O0	C10H4O7
C11H16O1	C10H4O8
C11H16O13	C10H6O5
C11H16O2	C10H6O6
C11H16O3	C10H6O7
C11H16O4	C10H8O4
C11H16O5	C10H8O5
C11H16O6	C10H8O6
C11H18O0	C10H8O7
C11H18O1	C11H10O5
C11H18O2	C11H10O6
C11H18O3	C11H10O8
C11H18O4	C11H12O4
C11H18O5	C11H12O5
C11H20O1	C11H12O6
C11H20O10	C11H12O7
C11H20O2	C11H12O8
C11H20O3	C11H12O9
C11H20O4	C11H14O0
C12H12O0	C11H14O2
C12H12O1	C11H14O3
C12H12O2	C11H14O4
C12H12O3	C11H14O5
C12H14O0	C11H14O6
C12H14O1	C11H14O7
C12H14O2	C11H14O8
C12H14O3	C11H14O9
C12H14O4	C11H16O0
C12H14O5	C11H16O1
C12H16O0	C11H16O2
C12H16O1	C11H16O3
C12H16O2	C11H16O4
C12H16O3	C11H16O5
C12H16O4	C11H16O6
C12H16O5	C11H16O7
C12H18O0	C11H16O8
C12H18O1	C11H18O0
C12H18O2	C11H18O1
C12H18O3	C11H18O2
C12H18O4	C11H18O3
C12H18O5	C11H18O4
C12H18O6	C11H18O5
C12H20O0	C11H20O0
C12H20O1	C11H20O1
C12H20O13	C11H20O2
C12H20O2	C11H20O3
C12H20O3	C11H20O4
C12H20O4	C11H20O5
C12H20O5	C11H22O1
C12H22O1	C11H22O2
C12H22O14	C11H22O3
C12H22O2	C11H22O4
C12H22O5	C11H6O8
C13H10O1	C11H8O5
C13H14O0	C11H8O7
C13H14O1	C12H10O6
C13H16O0	C12H10O7
C13H16O1	C12H12O5
C13H16O2	C12H12O7
C13H16O3	C12H12O8
C13H16O4	C12H14O3
C13H16O5	C12H14O4
C13H18O0	C12H14O5
C13H18O1	C12H14O6
C13H18O2	C12H14O7
C13H18O3	C12H14O8
C13H18O4	C12H14O9
C13H18O5	C12H16O0
C13H18O6	C12H16O1
C13H20O0	C12H16O2
C13H20O1	C12H16O4
C13H20O2	C12H16O5
C13H20O3	C12H16O6
C13H20O4	C12H16O7
C13H20O5	C12H16O8
C13H20O6	C12H16O9
C13H22O0	C12H18O0
C13H22O1	C12H18O1
C13H22O2	C12H18O2
C13H22O3	C12H18O3
C13H22O4	C12H18O4
C13H24O2	C12H18O5
C13H24O3	C12H18O6
C13H24O4	C12H18O7
C14H16O0	C12H18O8
C14H16O1	C12H20O0
C14H16O3	C12H20O1
C14H16O4	C12H20O2
C14H18O0	C12H20O3
C14H18O1	C12H20O4
C14H18O2	C12H22O1
C14H18O3	C12H22O2
C14H18O4	C12H22O3
C14H18O5	C12H22O4
C14H18O6	C12H24O2
C14H20O0	C13H12O6
C14H20O1	C13H12O7
C14H20O15	C13H12O8
C14H20O2	C13H12O9
C14H20O3	C13H14O10
C14H20O4	C13H14O5
C14H20O5	C13H14O7
C14H20O6	C13H14O8
C14H22O0	C13H14O9
C14H22O1	C13H16O10
C14H22O2	C13H16O4
C14H22O3	C13H16O5
C14H22O4	C13H16O6
C14H22O5	C13H16O7
C14H24O1	C13H16O8
C14H24O2	C13H16O9
C14H24O3	C13H18O0
C14H26O2	C13H18O1
C14H26O3	C13H18O5
C14H26O4	C13H18O6
C15H18O0	C13H18O7
C15H18O1	C13H18O8
C15H18O3	C13H18O9
C15H20O0	C13H20O0
C15H20O1	C13H20O1
C15H20O3	C13H20O2
C15H20O4	C13H20O3
C15H20O5	C13H20O4
C15H22O0	C13H22O0
C15H22O1	C13H22O1
C15H22O2	C13H22O2
C15H22O3	C13H22O3
C15H22O4	C13H22O4
C15H22O5	C13H24O0
C15H22O6	C13H24O1
C15H24O0	C13H24O2
C15H24O1	C13H24O3
C15H24O15	C13H26O2
C15H24O2	C13H26O3
C15H24O3	C14H12O9
C15H24O4	C14H14O5
C15H24O5	C14H14O6
C15H26O1	C14H14O7
C15H26O2	C14H14O8
C15H26O3	C14H14O9
C15H26O7	C14H16O10
C15H28O2	C14H16O6
C15H28O3	C14H16O7
C15H28O8	C14H16O8
C15H30O7	C14H16O9
C16H20O0	C14H18O10
C16H20O1	C14H18O5
C16H20O2	C14H18O6
C16H20O3	C14H18O7
C16H20O4	C14H18O8
C16H20O5	C14H18O9
C16H22O0	C14H20O0
C16H22O1	C14H20O1
C16H22O2	C14H20O6
C16H22O3	C14H20O8
C16H22O4	C14H20O9
C16H22O5	C14H22O0
C16H22O6	C14H22O1
C16H24O0	C14H22O2
C16H24O1	C14H22O3
C16H24O2	C14H22O5
C16H24O3	C14H22O7
C16H24O4	C14H24O1
C16H24O5	C14H24O2
C16H24O6	C14H24O3
C16H24O7	C14H24O4
C16H26O0	C14H28O2
C16H26O1	C15H12O8
C16H26O2	C15H14O10
C16H26O3	C15H14O7
C16H26O4	C15H14O8
C16H26O6	C15H14O9
C16H26O7	C15H16O10
C16H26O8	C15H16O6
C16H28O2	C15H16O7
C16H28O3	C15H16O8
C16H28O5	C15H16O9
C16H28O6	C15H18O5
C16H28O7	C15H18O6
C16H30O2	C15H18O7
C16H30O4	C15H18O8
C16H30O7	C15H18O9
C16H30O8	C15H20O10
C16H32O3	C15H20O7
C16H32O7	C15H20O8
C17H22O0	C15H20O9
C17H22O1	C15H22O0
C17H22O2	C15H22O1
C17H22O3	C15H22O7
C17H22O4	C15H22O8
C17H22O5	C15H24O0
C17H22O6	C15H24O1
C17H24O0	C15H24O2
C17H24O1	C15H24O3
C17H24O2	C15H24O4
C17H24O3	C15H26O0
C17H24O4	C15H26O1
C17H24O5	C15H26O15
C17H24O6	C15H26O2
C17H24O7	C15H26O3
C17H26O0	C15H26O4
C17H26O1	C15H26O5
C17H26O2	C15H28O7
C17H26O3	C15H30O2
C17H26O4	C16H14O8
C17H26O5	C16H14O9
C17H26O6	C16H16O10
C17H26O7	C16H16O7
C17H28O1	C16H16O8
C17H28O2	C16H16O9
C17H28O3	C16H18O10
C17H28O4	C16H18O6
C17H28O5	C16H18O7
C17H28O7	C16H18O8
C17H30O4	C16H18O9
C17H30O5	C16H20O6
C17H30O6	C16H20O7
C17H32O2	C16H20O8
C17H32O6	C16H20O9
C17H32O7	C16H22O10
C17H32O8	C16H22O7
C18H24O0	C16H22O8
C18H24O1	C16H22O9
C18H24O2	C16H24O0
C18H24O3	C16H24O1
C18H24O4	C16H24O2
C18H24O5	C16H24O3
C18H24O7	C16H24O4
C18H26O0	C16H24O7
C18H26O1	C16H24O8
C18H26O2	C16H26O0
C18H26O3	C16H26O1
C18H26O4	C16H26O2
C18H26O5	C16H26O3
C18H26O6	C16H26O4
C18H26O7	C16H26O5
C18H28O0	C16H26O6
C18H28O1	C16H28O0
C18H28O2	C16H28O2
C18H28O3	C16H28O3
C18H28O4	C16H28O4
C18H28O5	C16H28O6
C18H28O6	C16H28O7
C18H28O7	C16H30O5
C18H30O2	C16H30O6
C18H30O3	C16H30O7
C18H30O4	C16H32O4
C18H30O5	C16H32O8
C18H30O6	C17H14O6
C18H30O7	C17H14O9
C18H30O8	C17H16O8
C18H32O4	C17H16O9
C18H32O5	C17H18O10
C18H32O6	C17H18O7
C18H32O7	C17H18O8
C18H32O9	C17H18O9
C18H34O10	C17H20O10
C18H34O2	C17H20O7
C18H34O8	C17H20O8
C18H34O9	C17H20O9
C18H36O9	C17H22O8
C19H26O0	C17H22O9
C19H26O1	C17H24O0
C19H26O2	C17H24O1
C19H26O3	C17H24O2
C19H26O4	C17H26O0
C19H26O5	C17H26O1
C19H26O6	C17H26O2
C19H28O0	C17H26O3
C19H28O1	C17H26O4
C19H28O2	C17H26O7
C19H28O3	C17H26O8
C19H28O4	C17H26O9
C19H28O5	C17H28O0
C19H28O6	C17H28O1
C19H28O7	C17H28O2
C19H30O0	C17H28O3
C19H30O1	C17H28O4
C19H30O2	C17H28O5
C19H30O3	C17H28O6
C19H30O4	C17H2O1
C19H30O5	C17H30O3
C19H30O6	C17H30O4
C19H30O7	C17H30O5
C19H30O8	C17H34O6
C19H32O2	C18H14O7
C19H32O3	C18H16O9
C19H32O4	C18H18O10
C19H32O5	C18H18O12
C19H32O6	C18H18O8
C19H32O7	C18H18O9
C19H34O4	C18H20O10
C19H34O5	C18H20O7
C19H34O6	C18H20O8
C19H34O7	C18H20O9
C19H34O8	C18H22O7
C19H36O3	C18H22O8
C19H36O5	C18H22O9
C19H36O6	C18H24O8
C19H36O7	C18H24O9
C19H36O8	C18H28O0
C19H36O9	C18H28O1
C19H38O6	C18H28O2
C19H38O7	C18H30O0
C19H38O8	C18H30O1
C19H38O9	C18H30O2
C20H26O0	C18H30O3
C20H26O1	C18H30O4
C20H26O2	C18H30O5
C20H26O3	C18H30O6
C20H26O4	C18H32O3
C20H26O5	C18H32O4
C20H28O0	C18H32O5
C20H28O1	C19H16O7
C20H28O2	C19H16O8
C20H28O3	C19H16O9
C20H28O4	C19H18O10
C20H28O5	C19H18O8
C20H28O6	C19H18O9
C20H28O7	C19H20O10
C20H30O0	C19H20O8
C20H30O1	C19H20O9
C20H30O2	C19H22O7
C20H30O3	C19H22O8
C20H30O4	C19H22O9
C20H30O5	C19H28O0
C20H30O6	C19H28O1
C20H30O7	C19H28O2
C20H30O8	C19H28O3
C20H32O0	C19H28O4
C20H32O1	C19H30O0
C20H32O2	C19H30O1
C20H32O3	C19H30O2
C20H32O4	C19H30O3
C20H32O5	C19H30O4
C20H32O6	C19H30O5
C20H32O7	C19H30O6
C20H32O8	C19H32O0
C20H32O9	C19H32O2
C20H34O2	C19H32O3
C20H34O3	C19H32O4
C20H34O4	C19H32O5
C20H34O5	C19H32O6
C20H34O6	C19H34O3
C20H34O7	C19H34O4
C20H34O8	C19H34O5
C20H36O4	C1H2O3
C20H36O5	C1H2O4
C20H36O6	C20H18O10
C20H36O7	C20H18O7
C21H30O2	C20H18O8
C21H30O3	C20H18O9
C21H30O4	C20H20O10
C21H30O5	C20H20O8
C21H32O0	C20H20O9
C21H32O1	C20H22O10
C21H32O2	C20H22O15
C21H32O3	C20H22O7
C21H32O4	C20H22O8
C21H32O5	C20H22O9
C21H32O6	C20H28O0
C21H32O7	C20H28O1
C21H34O2	C20H30O0
C21H34O3	C20H30O1
C21H34O4	C20H30O2
C21H34O5	C20H30O3
C21H34O6	C20H30O4
C21H36O3	C20H30O5
C21H36O4	C20H32O0
C21H36O5	C20H32O1
C22H28O4	C20H32O2
C22H2O4	C20H32O3
C22H32O4	C20H32O4
C22H34O4	C20H32O5
C22H34O5	C20H32O6
C22H34O6	C20H34O0
C22H36O4	C20H34O1
C22H42O4	C20H34O2
C22H42O7	C20H34O3
C23H2O3	C20H34O4
C23H34O5	C20H34O5
C23H40O3	C20H34O6
C24H34O3	C20H34O7
C24H36O4	C20H36O2
C24H38O4	C20H36O3
C24H38O5	C20H36O4
C25H40O10	C20H36O5
C25H40O6	C20H36O6
C25H40O7	C20H36O8
C25H40O9	C21H20O10
C26H40O0	C21H20O8
C26H44O7	C21H20O9
C26H44O8	C21H22O14
C27H40O0	C21H22O8
C27H40O1	C21H24O7
C2H4O2	C21H24O8
C30H30O13	C21H24O9
C30H32O13	C21H32O4
C30H44O1	C21H34O4
C30H44O2	C21H36O4
C30H44O3	C22H22O8
C30H44O4	C22H22O9
C30H44O5	C22H24O7
C30H46O1	C22H24O9
C30H46O2	C23H4O3
C30H46O3	C25H28O6
C30H46O4	C26H28O2
C30H46O5	C27H34O14
C30H46O6	C2H2O3
C30H48O3	C2H2O4
C30H48O4	C2H4O2
C30H48O5	C2H4O3
C30H48O6	C2H4O4
C30H48O7	C2H6O2
C30H48O8	C2H8O12
C30H50O4	C30H52O4
C30H50O5	C30H52O5
C30H50O6	C3H10O1
C30H50O7	C3H2O2
C3H2O1	C3H2O5
C3H2O2	C3H4O1
C3H4O1	C3H4O11
C3H4O2	C3H4O2
C3H6O1	C3H4O3
C3H6O2	C3H4O4
C3H8O1	C3H6O1
C4H4O1	C3H6O13
C4H4O2	C3H6O2
C4H6O0	C3H6O3
C4H6O1	C3H6O4
C4H6O2	C3H8O1
C4H6O3	C3H8O2
C4H8O0	C4H10O0
C4H8O1	C4H10O1
C4H8O2	C4H10O2
C4H8O3	C4H10O3
C5H10O0	C4H2O4
C5H10O1	C4H4O2
C5H10O2	C4H4O3
C5H4O0	C4H4O4
C5H4O1	C4H4O5
C5H4O2	C4H4O6
C5H4O3	C4H6O1
C5H6O0	C4H6O2
C5H6O1	C4H6O3
C5H6O2	C4H6O4
C5H6O3	C4H6O5
C5H8O0	C4H8O0
C5H8O1	C4H8O1
C5H8O2	C4H8O2
C5H8O3	C4H8O3
C6H10O0	C4H8O4
C6H10O1	C5H10O0
C6H10O2	C5H10O1
C6H10O3	C5H10O2
C6H12O1	C5H10O3
C6H12O2	C5H12O0
C6H4O3	C5H12O1
C6H6O0	C5H12O2
C6H6O1	C5H2O4
C6H6O2	C5H2O5
C6H6O3	C5H2O6
C6H8O0	C5H4O3
C6H8O1	C5H4O4
C6H8O2	C5H4O5
C6H8O3	C5H4O6
C6H8O4	C5H6O0
C7H10O0	C5H6O1
C7H10O1	C5H6O2
C7H10O2	C5H6O3
C7H10O3	C5H6O4
C7H10O4	C5H6O5
C7H12O0	C5H6O6
C7H12O1	C5H8O0
C7H12O2	C5H8O1
C7H12O3	C5H8O2
C7H12O8	C5H8O3
C7H6O0	C5H8O4
C7H6O1	C5H8O5
C7H6O2	C6H10O0
C7H6O3	C6H10O1
C7H8O0	C6H10O2
C7H8O1	C6H10O3
C7H8O2	C6H10O4
C7H8O3	C6H10O5
C7H8O4	C6H12O0
C8H10O0	C6H12O1
C8H10O1	C6H12O2
C8H10O2	C6H12O3
C8H10O3	C6H14O1
C8H10O4	C6H14O2
C8H10O5	C6H2O5
C8H12O0	C6H4O3
C8H12O1	C6H4O4
C8H12O2	C6H4O5
C8H12O3	C6H4O6
C8H12O4	C6H6O3
C8H12O5	C6H6O4
C8H14O0	C6H6O5
C8H14O1	C6H6O6
C8H14O2	C6H8O0
C8H14O3	C6H8O1
C8H14O4	C6H8O2
C8H16O1	C6H8O3
C8H16O3	C6H8O4
C8H4O3	C6H8O5
C8H6O0	C6H8O6
C8H8O0	C7H10O0
C8H8O1	C7H10O1
C8H8O2	C7H10O2
C8H8O3	C7H10O3
C8H8O4	C7H10O4
C9H10O0	C7H10O5
C9H10O1	C7H10O6
C9H10O2	C7H10O7
C9H10O3	C7H12O0
C9H10O4	C7H12O1
C9H10O5	C7H12O2
C9H12O0	C7H12O3
C9H12O1	C7H12O4
C9H12O10	C7H12O5
C9H12O2	C7H14O0
C9H12O3	C7H14O1
C9H12O4	C7H14O2
C9H12O5	C7H14O3
C9H12O6	C7H14O8
C9H14O0	C7H4O4
C9H14O1	C7H4O5
C9H14O2	C7H4O6
C9H14O3	C7H4O7
C9H14O4	C7H6O2
C9H14O5	C7H6O3
C9H16O0	C7H6O4
C9H16O1	C7H6O5
C9H16O2	C7H6O6
C9H16O3	C7H6O7
C9H16O4	C7H8O0
C9H6O0	C7H8O1
C9H8O0	C7H8O2
C9H8O1	C7H8O3
C9H8O2	C7H8O4
C9H8O3	C7H8O5
C9H8O4	C7H8O6
	C7H8O7
	C7H8O8
	C8H10O0
	C8H10O1
	C8H10O2
	C8H10O3
	C8H10O4
	C8H10O5
	C8H10O6
	C8H10O7
	C8H10O8
	C8H12O0
	C8H12O1
	C8H12O2
	C8H12O3
	C8H12O4
	C8H12O5
	C8H12O6
	C8H12O7
	C8H14O0
	C8H14O1
	C8H14O2
	C8H14O3
	C8H14O4
	C8H14O5
	C8H14O6
	C8H16O0
	C8H16O1
	C8H16O2
	C8H16O3
	C8H16O4
	C8H18O1
	C8H18O3
	C8H4O4
	C8H4O5
	C8H4O6
	C8H6O3
	C8H6O4
	C8H6O5
	C8H6O6
	C8H6O7
	C8H8O0
	C8H8O3
	C8H8O4
	C8H8O5
	C8H8O6
	C8H8O7
	C8H8O8
	C9H10O0
	C9H10O1
	C9H10O2
	C9H10O3
	C9H10O4
	C9H10O5
	C9H10O6
	C9H10O7
	C9H10O8
	C9H12O0
	C9H12O1
	C9H12O2
	C9H12O3
	C9H12O4
	C9H12O5
	C9H12O6
	C9H12O7
	C9H12O8
	C9H14O0
	C9H14O1
	C9H14O2
	C9H14O3
	C9H14O4
	C9H14O5
	C9H14O6
	C9H14O7
	C9H16O0
	C9H16O1
	C9H16O2
	C9H16O3
	C9H16O4
	C9H16O5
	C9H18O0
	C9H18O1
	C9H18O2
	C9H18O3
	C9H18O4
	C9H4O5
	C9H4O6
	C9H4O7
	C9H6O4
	C9H6O5
	C9H6O6
	C9H6O7
	C9H8O0
	C9H8O3
	C9H8O4
	C9H8O5
	C9H8O6
	C9H8O7
	C9H8O8

## Sheet: Limonene APCI
APCI+	APCI-
C18H38O14	C21H24O6
C21H38O8	C24H28O7
C25H36O9	C24H38O12
C20H22O7	C24H24O6
C25H44O9	C12H12O8
C9H18O2	C17H26O12
C25H42O5	C20H28O12
C17H18O0	C24H28O9
C28H42O4	C17H34O11
C12H8O0	C19H24O2
C29H40O8	C17H32O2
C13H10O2	C21H22O8
C20H32O10	C28H46O9
C11H8O4	C21H36O9
C7H4O1	C23H38O7
C27H48O9	C19H26O2
C25H42O3	C6H4O2
C23H38O9	C18H32O11
C22H26O7	C29H42O11
C27H48O8	C21H22O5
C25H40O9	C30H12O5
C2H2O3	C11H20O15
C10H14O7	C23H32O4
C11H22O4	C28H52O7
C13H26O4	C22H32O9
C3H8O2	C18H24O2
C10H6O5	C10H22O5
C3H4O3	C13H6O13
C7H14O1	C26H32O7
C19H30O12	C23H36O12
C29H56O15	C27H34O7
C8H16O0	C24H36O5
C23H38O3	C18H34O10
C19H38O14	C21H32O12
C8H4O4	C29H46O7
C20H38O4	C28H38O7
C17H22O13	C21H24O7
C7H4O0	C17H30O9
C8H2O0	C19H28O11
C21H38O7	C22H30O8
C29H28O15	C11H16O10
C13H10O1	C18H36O4
C19H38O8	C3H10O11
C10H18O0	C17H32O9
C25H40O3	C12H20O2
C28H4O11	C28H36O9
C4H4O3	C22H16O5
C19H36O15	C6H4O6
C13H18O6	C15H12O7
C16H26O0	C25H44O6
C17H36O9	C23H30O7
C23H16O9	C15H20O11
C24H30O10	C19H36O3
C19H36O4	C26H34O6
C15H14O0	C14H12O7
C28H38O8	C23H4O7
C12H12O0	C11H20O1
C30H46O9	C6H10O7
C18H14O1	C27H44O7
C23H12O10	C22H34O12
C25H18O0	C23H30O6
C29H40O7	C28H42O11
C17H14O5	C30H42O8
C25H2O14	C21H42O2
C29H14O0	C11H20O10
C24H24O4	C22H34O5
C17H16O5	C30H48O7
C29H22O5	C20H22O5
C24H6O10	C14H20O11
C27H44O9	C30H44O10
C24H30O8	C18H18O3
C16H8O8	C23H28O10
C12H8O4	C29H40O10
C22H32O2	C23H30O11
C14H24O6	C22H34O11
C30H56O1	C24H40O11
C15H24O0	C24H4O6
C20H36O7	C14H24O11
C27H52O11	C7H14O1
C22H46O15	C13H16O10
C17H18O3	C24H42O5
C21H26O14	C23H36O5
C15H20O0	C16H28O10
C13H12O4	C30H42O9
C25H14O10	C12H12O1
C24H34O9	C24H42O9
C21H26O2	C12H14O1
C14H28O2	C26H46O5
C20H2O13	C24H30O6
C10H12O13	C30H44O7
C27H24O5	C13H24O10
C29H42O3	C22H24O8
C23H44O2	C19H34O11
C14H12O1	C23H38O10
C13H14O13	C26H48O6
C18H32O8	C25H30O8
C30H44O4	C29H44O11
C20H34O2	C25H30O9
C6H4O2	C6H12O1
C28H24O15	C23H36O7
C12H22O0	C26H42O11
C7H6O5	C24H42O6
C29H42O9	C18H36O9
C27H38O9	C6H12O7
C22H20O3	C24H8O1
C25H32O4	C17H32O10
C9H2O13	C25H34O11
C27H26O10	C3H4O5
C11H12O7	C17H32O8
C23H30O4	C27H42O6
C8H6O11	C26H42O7
C22H24O6	C18H34O5
C13H28O13	C30H46O10
C18H34O4	C29H40O7
C26H8O2	C16H20O1
C29H40O9	C23H30O8
C7H14O2	C28H38O10
C16H28O10	C22H40O9
C28H56O9	C29H46O10
C24H38O9	C17H20O9
C28H40O9	C12H16O10
C19H16O6	C22H40O8
C18H26O8	C27H34O9
C22H36O5	C21H34O4
C13H16O7	C30H48O9
C28H46O8	C22H26O5
C30H56O2	C23H40O5
C9H14O14	C25H46O6
C16H6O9	C10H4O8
C27H40O3	C8H12O8
C21H26O4	C24H32O11
C10H8O4	C13H14O9
C23H34O14	C16H16O9
C21H30O9	C30H46O7
C16H16O0	C20H24O3
C20H22O2	C19H24O11
C30H42O8	C24H28O8
C23H22O5	C22H38O11
C24H36O5	C10H14O9
C26H20O2	C17H34O10
C11H18O8	C23H26O7
C21H42O11	C26H32O9
C19H34O1	C23H26O8
C29H10O2	C22H28O6
C20H34O13	C19H28O12
C8H10O7	C15H28O10
C16H16O5	C17H24O10
C29H48O15	C7H8O7
C26H6O2	C14H22O11
C28H30O10	C24H44O6
C17H18O7	C25H40O11
C27H40O6	C16H18O10
C16H28O8	C16H30O7
C28H8O4	C26H32O8
C27H24O8	C16H20O10
C7H16O3	C15H20O10
C12H20O1	C17H32O6
C15H30O7	C11H22O5
C8H8O6	C28H42O7
C20H24O0	C29H44O7
C23H16O8	C20H34O3
C16H18O1	C5H6O6
C25H42O9	C18H22O2
C30H14O6	C25H32O10
C5H10O5	C11H18O14
C30H20O9	C23H32O6
C10H22O5	C19H20O9
C22H46O7	C29H40O9
C12H22O11	C27H44O10
C30H12O5	C23H32O10
C23H30O3	C30H48O8
C15H26O7	C25H12O1
C25H10O12	C17H34O6
C8H16O12	C16H26O4
C20H40O7	C21H22O7
C21H24O7	C15H26O11
C8H6O14	C15H28O2
C25H32O8	C20H30O4
C18H30O0	C25H42O10
C9H6O4	C17H32O7
C28H40O6	C24H42O8
C15H24O1	C25H46O5
C12H22O1	C24H30O10
C27H34O2	C21H40O5
C22H40O12	C18H26O11
C29H50O13	C23H34O5
C26H28O0	C14H28O9
C24H42O6	C11H10O7
C23H34O9	C15H30O7
C25H34O6	C13H26O8
C19H30O10	C22H42O6
C19H36O10	C20H38O9
C18H14O12	C8H10O8
C16H26O7	C18H34O8
C28H26O6	C21H32O10
C13H12O5	C14H12O2
C15H16O6	C12H14O9
C20H34O1	C19H12O1
C15H26O4	C27H40O6
C23H38O6	C14H28O3
C22H36O3	C27H34O8
C15H18O7	C30H44O9
C26H42O8	C19H30O12
C27H2O0	C19H36O9
C11H12O6	C8H8O7
C20H24O10	C26H36O11
C15H32O1	C23H38O8
C9H12O6	C26H38O6
C7H8O5	C22H28O7
C9H12O8	C25H34O6
C28H40O8	C15H30O6
C13H24O6	C3H8O7
C29H42O5	C15H30O8
C22H36O8	C20H22O9
C22H18O0	C29H42O7
C21H26O5	C27H42O11
C19H34O8	C27H44O8
C17H36O13	C28H40O7
C30H18O0	C25H40O6
C14H28O10	C28H44O10
C27H32O13	C14H18O2
C19H22O1	C27H38O11
C17H10O10	C14H24O2
C16H30O3	C15H20O2
C21H36O8	C29H40O8
C14H20O8	C29H46O9
C15H24O8	C21H28O11
C13H24O5	C26H40O11
C19H34O11	C20H28O10
C27H44O8	C18H36O8
C26H42O6	C14H20O1
C24H14O1	C17H18O2
C5H8O5	C23H42O5
C13H26O3	C21H20O13
C15H16O0	C11H8O6
C15H6O9	C22H24O7
C22H32O9	C17H14O7
C27H10O4	C2H6O8
C22H4O9	C5H4O1
C16H28O5	C9H10O8
C21H4O12	C5H12O6
C17H18O4	C8H10O14
C30H34O7	C29H46O8
C18H18O2	C28H38O9
C21H10O15	C30H46O8
C12H16O6	C28H40O10
C11H14O6	C22H42O5
C23H36O9	C22H30O10
C22H30O6	C27H38O6
C21H36O4	C20H40O2
C22H40O7	C20H24O6
C28H16O1	C19H34O6
C27H4O8	C19H22O10
C17H18O5	C20H20O3
C20H24O8	C19H38O4
C30H44O9	C21H40O6
C25H38O3	C28H44O8
C5H6O4	C12H8O5
C18H28O8	C12H24O6
C28H24O11	C16H30O6
C23H24O9	C25H38O6
C14H26O6	C26H36O6
C22H42O2	C30H44O8
C11H8O3	C27H40O11
C22H28O5	C13H26O3
C15H24O7	C14H14O7
C28H46O4	C13H18O1
C24H40O9	C4H10O4
C27H40O5	C30H46O9
C13H20O7	C25H36O6
C24H50O13	C22H30O11
C20H12O0	C10H16O9
C19H2O15	C11H8O5
C21H20O11	C28H38O8
C27H44O6	C20H20O7
C21H28O8	C19H32O3
C30H44O14	C15H18O10
C15H18O6	C20H26O11
C26H34O8	C29H42O10
C19H28O12	C20H30O12
C21H30O7	C27H44O9
C22H36O7	C25H42O9
C23H32O4	C5H2O5
C30H44O3	C26H42O10
C13H22O1	C17H28O11
C26H32O1	C12H24O7
C26H38O5	C22H26O9
C14H14O5	C23H28O6
C27H16O13	C16H18O8
C23H28O5	C11H18O10
C25H26O13	C25H36O11
C16H34O9	C25H32O7
C14H12O2	C21H38O9
C19H34O6	C17H36O11
C17H28O2	C15H22O11
C15H28O15	C27H36O10
C19H8O14	C24H32O6
C30H44O6	C18H16O6
C17H26O8	C17H16O8
C27H46O8	C29H44O10
C18H22O8	C21H32O6
C17H26O10	C19H36O4
C25H52O4	C15H16O9
C26H22O13	C20H24O10
C18H18O4	C23H24O14
C29H34O11	C20H32O3
C16H28O1	C26H38O11
C22H26O5	C22H28O5
C26H42O4	C27H36O7
C29H44O7	C19H22O3
C15H32O9	C22H28O8
C17H28O9	C26H34O10
C17H30O3	C16H32O3
C26H40O6	C25H42O6
C30H44O7	C28H42O10
C16H20O0	C16H16O2
C14H20O7	C25H38O11
C30H42O5	C26H40O9
C16H28O3	C14H26O10
C24H36O6	C22H36O8
C5H10O6	C20H38O7
C16H28O4	C15H22O10
C25H38O7	C17H18O8
C7H10O5	C28H44O9
C7H4O2	C25H6O5
C8H10O5	C15H14O8
C29H42O6	C26H34O7
C22H28O8	C16H22O11
C27H38O6	C27H42O7
C30H50O6	C21H36O7
C12H10O1	C23H36O10
C4H10O0	C23H32O7
C16H28O9	C22H36O5
C28H42O9	C26H42O8
C14H26O1	C18H30O11
C23H28O7	C24H40O6
C25H36O7	C23H32O5
C28H44O9	C24H30O7
C26H52O12	C23H38O6
C17H28O8	C29H44O9
C19H36O9	C22H40O5
C16H30O1	C24H34O11
C26H36O9	C24H38O11
C25H40O8	C12H20O10
C7H16O6	C17H18O7
C21H32O2	C20H32O12
C19H28O11	C19H24O3
C16H16O1	C29H42O8
C29H44O3	C15H26O3
C21H36O9	C24H30O9
C5H4O0	C23H34O10
C28H46O7	C22H44O6
C21H24O5	C13H24O9
C22H42O7	C22H28O10
C15H22O8	C18H34O6
C24H42O7	C15H12O4
C20H38O2	C3H2O3
C14H26O5	C8H4O6
C8H6O3	C16H28O4
C28H42O6	C25H42O8
C19H34O3	C20H38O6
C24H42O4	C25H32O9
C17H18O6	C15H24O10
C15H28O1	C29H42O9
C30H48O3	C11H22O4
C26H42O7	C22H36O11
C25H34O7	C19H36O8
C26H40O4	C29H44O8
C25H34O3	C18H34O3
C20H28O10	C15H12O5
C20H26O7	C22H32O6
C5H10O3	C27H42O10
C13H22O0	C24H40O10
C26H36O4	C28H42O8
C30H46O3	C26H42O9
C21H28O2	C15H28O8
C7H12O5	C17H16O3
C25H44O6	C17H22O1
C25H42O7	C19H20O3
C9H6O2	C15H28O3
C11H10O5	C21H38O7
C22H28O6	C16H20O9
C6H14O7	C12H18O10
C30H44O2	C14H28O7
C26H40O9	C23H32O9
C27H42O5	C19H30O3
C17H22O7	C9H6O6
C19H28O10	C24H36O11
C14H18O6	C22H30O9
C16H30O5	C13H12O7
C16H28O2	C13H22O10
C16H28O7	C28H40O9
C21H24O6	C19H32O10
C19H24O7	C22H36O6
C14H18O15	C27H36O9
C15H26O6	C25H42O7
C27H42O9	C23H34O7
C10H20O2	C19H18O4
C14H12O3	C23H32O8
C24H42O8	C19H30O10
C14H22O0	C21H34O9
C8H6O2	C20H20O6
C29H46O7	C17H20O2
C25H38O8	C10H8O2
C30H16O9	C24H30O8
C11H16O6	C19H18O7
C22H34O9	C22H26O6
C11H20O1	C10H16O15
C9H12O10	C15H24O1
C27H38O3	C24H32O10
C27H36O8	C18H20O8
C10H10O5	C19H18O6
C3H2O1	C22H38O5
C25H20O0	C16H30O9
C28H44O5	C25H34O10
C8H6O0	C12H12O7
C22H40O8	C22H32O10
C25H24O2	C24H34O6
C11H20O6	C20H28O2
C26H38O9	C21H30O11
C27H44O7	C26H34O9
C6H4O3	C23H28O7
C16H18O6	C28H42O9
C30H46O6	C22H38O10
C24H34O3	C5H4O6
C16H16O3	C21H36O10
C19H26O9	C27H38O10
C20H28O9	C26H34O8
C17H30O7	C27H36O8
C14H20O0	C21H30O9
C12H14O6	C22H30O5
C27H40O9	C19H18O5
C18H28O10	C22H36O10
C6H4O0	C20H20O5
C18H20O7	C20H30O2
C10H18O6	C24H38O6
C21H34O9	C13H18O10
C23H32O3	C5H12O5
C25H46O5	C17H26O11
C18H32O4	C21H24O8
C18H24O1	C25H40O10
C18H30O9	C6H14O4
C16H22O8	C20H24O4
C30H44O15	C16H24O11
C18H34O7	C11H12O1
C15H18O0	C20H24O2
C30H48O8	C22H40O6
C23H34O3	C26H40O10
C22H26O6	C26H36O10
C23H4O3	C25H34O7
C20H40O4	C14H22O10
C19H22O5	C23H36O8
C23H30O8	C22H26O7
C29H46O4	C20H20O4
C19H20O6	C14H16O9
C24H32O6	C27H38O7
C20H30O8	C19H22O7
C27H38O7	C20H32O4
C23H40O9	C25H40O7
C30H46O7	C14H14O8
C22H28O15	C14H12O3
C13H12O1	C27H40O10
C17H30O4	C16H14O6
C23H36O5	C22H38O6
C25H44O5	C24H36O6
C22H32O5	C30H10O5
C18H32O1	C14H26O4
C18H34O3	C12H10O6
C15H24O15	C13H20O10
C27H40O2	C12H16O1
C28H42O5	C25H10O1
C25H40O7	C18H24O10
C18H30O2	C23H36O6
C26H38O7	C24H32O7
C22H30O3	C13H10O3
C20H30O12	C19H20O8
C12H18O7	C27H42O9
C27H42O6	C23H34O8
C18H18O1	C25H38O7
C19H30O0	C26H38O7
C11H10O1	C3H6O5
C23H32O5	C27H40O7
C17H16O3	C20H36O4
C12H10O4	C20H28O11
C24H42O5	C19H34O4
C24H42O9	C19H28O10
C4H10O3	C20H22O8
C22H34O3	C25H40O9
C24H32O7	C21H26O5
C25H36O4	C21H26O9
C10H20O4	C20H38O5
C21H34O3	C17H16O7
C13H20O6	C27H42O8
C29H44O9	C21H30O10
C14H24O7	C26H38O10
C13H12O3	C22H38O9
C18H22O6	C17H22O9
C18H34O5	C19H34O7
C28H40O5	C19H32O11
C23H36O6	C10H6O6
C6H14O3	C14H26O2
C24H34O4	C11H14O1
C17H22O8	C21H28O10
C24H30O7	C25H40O8
C21H34O7	C26H36O7
C25H42O6	C18H28O11
C25H44O4	C24H38O10
C15H28O7	C25H34O9
C14H14O1	C25H38O10
C23H42O9	C24H32O9
C14H26O3	C25H36O7
C13H12O2	C22H34O10
C24H38O8	C19H36O7
C8H16O5	C8H6O2
C11H24O5	C19H34O10
C16H24O8	C20H26O2
C7H14O4	C10H20O8
C26H38O3	C18H20O3
C18H20O4	C12H22O9
C27H38O4	C25H36O10
C14H30O3	C21H30O7
C30H20O7	C22H38O8
C25H32O7	C27H38O9
C18H34O6	C18H32O10
C16H18O7	C18H26O3
C16H16O6	C27H38O8
C18H22O0	C26H40O8
C22H34O8	C20H36O10
C9H14O6	C16H14O5
C23H30O5	C20H28O4
C15H20O6	C24H34O10
C14H22O7	C13H14O8
C17H30O2	C25H34O8
C23H40O4	C18H34O2
C11H18O0	C17H28O10
C19H32O8	C11H10O6
C17H26O9	C7H4O3
C22H38O4	C24H32O8
C15H14O2	C15H14O7
C24H38O5	C22H38O7
C12H10O2	C27H40O9
C12H10O3	C17H28O5
C24H32O8	C14H16O2
C18H28O2	C23H34O9
C26H16O0	C17H16O4
C30H44O8	C26H36O8
C20H30O9	C19H22O9
C18H18O5	C16H22O10
C23H28O6	C19H22O6
C22H34O5	C24H36O10
C16H30O2	C9H16O8
C24H40O4	C12H16O9
C14H16O6	C11H22O8
C20H36O2	C27H40O8
C25H40O6	C11H16O9
C29H20O6	C26H36O9
C12H12O5	C20H30O10
C9H18O1	C16H30O8
C21H26O3	C20H24O9
C27H36O7	C19H24O10
C18H26O9	C25H38O8
C23H32O6	C18H18O6
C24H32O5	C15H14O5
C21H32O3	C26H38O9
C26H34O6	C22H32O7
C15H22O7	C25H38O9
C18H30O3	C24H34O7
C16H20O15	C14H12O6
C27H40O7	C11H16O2
C21H34O8	C21H32O5
C19H26O0	C12H10O3
C6H12O3	C12H10O2
C19H24O8	C21H28O5
C16H32O10	C25H36O9
C24H40O8	C26H38O8
C27H42O4	C24H38O7
C8H14O6	C15H28O9
C13H20O0	C17H30O10
C22H34O7	C14H20O10
C30H42O4	C23H36O9
C24H30O6	C25H36O8
C21H26O7	C16H16O6
C25H38O4	C8H16O5
C22H38O5	C20H34O11
C26H34O7	C19H32O4
C5H10O0	C21H28O6
C25H36O8	C13H24O2
C13H14O5	C8H16O6
C13H24O1	C20H22O7
C24H36O4	C16H18O2
C19H34O5	C18H18O4
C21H36O5	C24H36O7
C22H38O8	C17H16O6
C25H40O4	C16H26O10
C24H40O7	C19H30O5
C30H42O7	C24H38O9
C19H24O1	C20H24O5
C16H28O6	C18H32O5
C11H18O6	C19H28O3
C24H34O6	C21H36O6
C23H40O8	C15H18O9
C30H46O4	C14H24O3
C16H20O6	C18H22O9
C18H28O1	C15H16O2
C15H22O0	C6H10O9
C25H34O4	C15H16O8
C9H14O11	C21H26O8
C22H30O4	C24H34O9
C18H28O0	C14H24O10
C19H22O7	C9H6O2
C22H34O4	C13H10O5
C23H38O8	C10H10O7
C28H44O8	C21H30O5
C21H28O6	C6H12O5
C27H36O6	C20H30O11
C10H22O4	C21H26O6
C13H22O6	C24H34O8
C27H38O5	C21H34O6
C22H30O5	C20H30O3
C20H32O9	C13H10O4
C22H36O9	C7H14O6
C24H36O8	C19H20O7
C20H22O6	C24H38O8
C26H40O8	C13H12O3
C25H32O6	C14H26O9
C22H32O3	C24H36O9
C15H22O1	C18H34O7
C23H36O2	C15H16O7
C24H32O4	C20H32O11
C23H38O4	C19H36O6
C22H28O4	C15H22O3
C23H36O8	C24H36O8
C29H46O5	C11H8O3
C22H30O8	C18H18O5
C10H12O6	C21H32O9
C19H34O7	C17H16O5
C22H32O4	C12H14O8
C15H14O4	C9H12O8
C30H46O8	C22H34O9
C11H10O3	C22H36O9
C27H42O8	C21H26O7
C18H28O9	C22H34O6
C24H38O4	C21H28O7
C28H26O0	C16H16O5
C14H22O6	C21H28O9
C12H12O1	C7H16O5
C17H20O6	C20H22O6
C24H22O0	C21H36O8
C16H26O1	C12H24O3
C14H20O15	C19H34O9
C15H26O5	C10H12O8
C18H20O5	C17H30O8
C15H14O1	C17H30O7
C19H36O2	C26H2O3
C25H40O5	C16H30O2
C19H32O9	C15H24O2
C14H24O1	C22H24O13
C24H34O8	C17H20O8
C7H14O3	C17H28O4
C23H32O8	C17H18O6
C25H42O8	C14H22O2
C14H14O2	C7H6O1
C15H16O5	C21H34O8
C30H46O2	C17H30O5
C19H20O3	C22H32O8
C10H16O6	C11H22O6
C19H20O5	C13H14O2
C17H32O3	C13H18O9
C18H32O2	C9H18O7
C20H24O5	C19H20O6
C25H36O3	C18H28O4
C14H20O6	C12H18O9
C22H38O6	C7H6O6
C26H36O8	C14H18O9
C22H32O6	C16H26O5
C20H24O1	C7H14O5
C20H32O1	C19H26O3
C25H38O1	C20H22O4
C18H32O3	C7H4O5
C25H44O8	C20H24O8
C19H20O4	C14H28O2
C22H36O4	C19H20O5
C24H40O6	C8H16O7
C22H34O6	C14H14O2
C19H22O3	C14H16O8
C29H42O8	C6H14O5
C28H40O7	C5H10O1
C13H8O9	C9H18O6
C14H14O0	C19H26O10
C13H26O6	C19H20O4
C23H34O8	C16H24O4
C17H20O7	C11H20O3
C19H32O3	C19H36O5
C21H28O4	C9H18O4
C28H44O6	C10H6O5
C15H20O7	C12H22O14
C21H36O7	C19H22O8
C18H22O2	C12H8O1
C30H46O5	C9H8O1
C30H48O4	C10H8O6
C9H6O3	C12H20O9
C22H28O7	C11H18O2
C29H44O8	C6H6O6
C27H38O8	C22H36O7
C18H22O1	C16H28O6
C20H34O7	C21H32O8
C13H16O6	C17H26O10
C12H20O7	C17H30O6
C24H40O5	C19H30O4
C6H12O2	C13H22O9
C20H30O10	C21H28O8
C25H38O6	C13H16O2
C12H10O0	C11H14O8
C20H20O4	C11H12O7
C13H12O0	C15H26O9
C25H42O4	C13H12O2
C5H4O1	C19H24O9
C21H28O5	C17H34O2
C19H22O4	C22H34O7
C22H32O8	C14H22O1
C20H22O3	C13H24O8
C19H28O8	C16H18O7
C21H28O3	C18H32O9
C20H24O7	C16H30O3
C17H30O5	C8H4O5
C14H24O2	C20H26O9
C21H32O7	C22H34O8
C28H44O7	C15H28O4
C25H38O5	C20H28O3
C24H38O7	C12H20O3
C17H30O6	C8H6O6
C18H30O8	C14H12O5
C26H40O5	C18H26O10
C17H24O8	C19H34O5
C23H30O7	C16H28O5
C21H34O4	C11H18O9
C10H18O11	C21H30O6
C15H16O2	C18H20O7
C26H38O8	C10H20O7
C17H28O3	C14H20O2
C19H24O0	C19H34O8
C5H10O2	C17H18O4
C29H52O7	C14H26O3
C11H10O4	C16H24O10
C3H4O2	C20H26O6
C21H34O6	C9H4O5
C17H26O1	C11H20O9
C10H20O3	C13H22O2
C21H36O6	C14H22O3
C20H40O6	C20H24O7
C29H42O7	C17H26O3
C23H36O4	C18H30O10
C15H20O1	C15H18O8
C19H32O7	C15H20O9
C5H8O4	C9H10O7
C15H30O3	C13H16O8
C13H28O4	C4H10O5
C25H34O5	C7H4O4
C12H22O14	C11H4O2
C28H42O7	C19H32O6
C20H28O8	C3H4O1
C19H30O9	C12H22O2
C14H14O3	C18H30O5
C21H32O4	C18H24O3
C15H26O3	C20H30O5
C18H22O7	C17H24O3
C7H6O4	C18H22O8
C18H20O6	C21H30O8
C16H26O2	C10H6O4
C30H48O5	C14H26O5
C16H16O4	C9H6O5
C13H20O1	C16H22O9
C21H40O2	C18H24O9
C26H40O7	C16H20O2
C15H30O6	C18H28O10
C12H18O6	C13H20O9
C16H26O6	C20H26O3
C21H30O3	C13H24O3
C29H44O4	C20H36O9
C21H26O6	C12H10O5
C15H22O6	C7H10O7
C16H24O1	C14H12O4
C19H28O0	C13H12O6
C6H8O4	C14H20O9
C5H4O3	C20H22O3
C10H16O10	C14H24O9
C16H24O0	C18H22O3
C16H18O0	C11H8O4
C26H36O7	C11H18O3
C16H26O3	C17H26O4
C12H20O13	C15H14O4
C20H38O3	C4H4O5
C12H24O3	C11H20O2
C19H30O1	C17H20O3
C19H28O9	C14H24O4
C21H30O8	C9H14O8
C17H28O7	C18H32O6
C22H38O7	C16H20O8
C9H18O4	C14H26O8
C26H18O0	C16H28O8
C26H36O6	C15H24O3
C15H16O3	C10H10O1
C16H24O9	C15H26O4
C27H40O0	C20H26O8
C25H36O6	C14H16O7
C24H36O7	C17H22O2
C23H40O5	C21H32O7
C17H20O1	C7H12O7
C18H20O2	C19H22O4
C23H38O5	C13H24O7
C23H38O7	C16H28O9
C11H12O5	C14H26O7
C20H36O4	C9H18O5
C23H30O6	C12H10O4
C19H26O8	C21H34O7
C20H36O5	C19H24O8
C13H16O5	C19H28O4
C20H22O4	C13H12O4
C29H44O5	C18H32O7
C19H36O7	C12H16O8
C22H30O7	C9H18O3
C23H34O5	C15H16O3
C30H44O5	C6H4O5
C17H18O1	C18H32O8
C16H20O1	C11H10O2
C23H36O7	C3H8O5
C11H12O0	C4H8O5
C30H48O6	C20H26O4
C18H24O14	C18H26O4
C6H10O4	C15H24O4
C16H16O2	C15H28O7
C21H28O7	C19H32O9
C17H16O13	C13H14O7
C23H32O7	C16H20O3
C16H18O5	C19H26O9
C20H22O5	C6H8O6
C16H18O2	C8H10O7
C24H34O7	C10H18O8
C25H36O5	C20H28O9
C22H22O1	C13H24O5
C11H20O5	C13H24O6
C22H36O6	C19H26O4
C21H30O5	C11H12O2
C9H16O0	C19H22O5
C16H30O4	C17H28O9
C17H26O7	C11H22O7
C19H22O6	C9H18O1
C16H22O0	C18H20O6
C23H34O7	C3H2O4
C20H36O3	C12H12O2
C17H20O0	C15H22O9
C12H26O5	C17H24O9
C8H16O1	C2H6O5
C8H16O2	C14H18O8
C16H24O7	C18H20O4
C16H22O7	C17H18O5
C20H34O8	C16H24O2
C12H24O5	C16H24O1
C24H38O6	C18H20O5
C15H16O1	C8H16O4
C29H44O6	C12H14O7
C16H14O0	C20H36O5
C18H34O2	C17H20O7
C27H40O4	C16H16O4
C20H24O2	C20H34O10
C3H4O1	C3H8O4
C4H6O0	C13H18O2
C18H20O3	C10H20O6
C14H24O3	C12H12O6
C12H24O4	C13H22O3
C10H14O6	C19H24O4
C26H38O6	C11H10O3
C15H16O4	C20H26O7
C21H30O4	C14H14O6
C22H42O4	C17H22O8
C22H32O7	C13H24O4
C17H18O2	C18H28O5
C15H26O2	C19H24O5
C24H34O5	C15H20O8
C17H20O5	C13H20O2
C13H24O3	C15H16O4
C11H20O3	C20H26O5
C20H32O8	C14H22O9
C13H18O0	C7H14O9
C19H26O7	C7H14O4
C11H14O0	C10H20O5
C9H10O5	C5H12O4
C21H32O8	C15H18O7
C20H24O6	C18H24O4
C10H8O1	C18H22O7
C11H18O1	C15H24O9
C12H14O5	C14H20O3
C12H14O0	C15H18O3
C12H16O0	C17H28O6
C13H14O1	C9H6O3
C21H30O6	C18H30O9
C26H38O4	C15H26O8
C15H28O2	C19H24O7
C14H24O4	C16H24O9
C19H26O1	C18H26O9
C20H26O0	C9H8O6
C14H20O1	C20H32O10
C23H34O6	C19H32O5
C19H24O6	C18H22O4
C12H22O3	C14H14O4
C9H8O4	C13H12O5
C17H22O6	C8H12O7
C18H22O5	C14H22O4
C13H24O2	C19H28O9
C19H28O1	C17H26O9
C21H34O5	C12H24O2
C13H22O5	C4H4O1
C15H18O1	C20H36O8
C21H26O15	C13H20O8
C11H16O0	C19H30O9
C16H22O6	C12H18O2
C14H24O5	C18H24O8
C19H30O8	C13H18O8
C7H12O8	C10H14O8
C21H32O6	C5H4O5
C19H30O7	C6H10O6
C18H24O7	C15H16O6
C14H26O2	C10H18O1
C20H24O3	C12H14O2
C15H14O3	C14H24O8
C8H18O3	C17H24O4
C9H16O5	C16H26O9
C14H16O1	C16H18O3
C18H22O3	C14H20O8
C12H12O4	C9H16O7
C2H4O2	C16H22O3
C16H26O8	C12H22O3
C8H12O5	C15H28O6
C18H28O7	C17H22O3
C14H16O5	C20H28O5
C17H24O7	C11H14O2
C14H22O1	C12H22O8
C11H20O4	C13H22O4
C13H22O2	C14H26O6
C16H18O4	C16H18O4
C10H8O0	C19H32O8
C23H42O7	C18H36O2
C16H18O3	C19H26O8
C14H16O0	C12H12O3
C18H26O0	C19H30O6
C13H16O0	C7H12O6
C16H24O6	C12H22O4
C4H8O1	C20H28O8
C20H34O6	C16H28O7
C10H4O8	C13H16O7
C15H24O5	C19H24O6
C19H28O7	C18H28O9
C4H8O4	C16H24O5
C10H20O5	C10H16O8
C17H28O6	C14H14O3
C20H24O4	C18H30O6
C25H22O1	C8H16O3
C12H18O0	C16H20O7
C14H14O4	C19H26O7
C9H18O3	C12H18O8
C12H20O6	C10H8O5
C18H32O7	C8H8O6
C17H22O0	C15H20O7
C15H28O3	C15H22O4
C20H34O3	C8H6O5
C14H22O5	C11H10O5
C4H8O0	C19H28O5
C19H24O2	C18H22O5
C5H4O2	C12H16O2
C16H26O5	C18H22O6
C5H10O1	C13H14O6
C19H32O4	C16H22O8
C13H18O5	C18H24O5
C14H18O5	C19H26O6
C12H6O1	C18H26O5
C12H16O5	C4H6O5
C21H32O5	C15H26O7
C11H10O2	C15H22O8
C12H16O1	C13H22O8
C14H18O0	C16H18O6
C12H22O4	C17H20O4
C12H12O2	C17H26O5
C14H18O1	C14H18O7
C16H26O4	C18H24O7
C11H20O2	C14H18O3
C9H6O0	C19H26O5
C13H14O4	C14H16O3
C19H32O6	C14H22O8
C23H40O6	C11H20O4
C23H40O7	C14H14O5
C8H18O2	C15H16O5
C20H28O7	C8H14O7
C17H20O4	C17H28O8
C18H32O5	C14H24O7
C11H18O5	C18H30O8
C20H32O7	C15H24O8
C14H20O5	C12H12O5
C15H18O5	C10H12O7
C8H8O4	C15H20O3
C12H14O1	C16H26O6
C17H26O2	C12H20O8
C12H20O5	C7H14O3
C8H14O0	C13H26O2
C20H26O6	C17H20O6
C17H20O3	C18H24O6
C18H30O7	C15H22O5
C17H32O2	C17H28O7
C18H22O4	C19H32O7
C14H16O4	C17H22O7
C18H24O6	C20H28O7
C18H24O2	C13H22O5
C7H12O4	C20H30O9
C5H8O3	C8H14O1
C13H14O0	C14H22O7
C13H16O1	C20H28O6
C5H6O3	C18H26O8
C13H14O2	C11H10O4
C15H24O6	C4H2O4
C15H20O5	C11H12O6
C20H26O1	C20H34O9
C16H24O2	C15H20O4
C11H22O5	C18H30O7
C17H20O2	C13H18O7
C23H42O8	C17H22O4
C11H12O4	C11H16O8
C16H22O1	C15H28O5
C26H20O0	C15H26O5
C7H12O0	C19H28O8
C11H14O5	C16H22O7
C9H14O5	C12H12O4
C15H24O2	C9H6O4
C13H20O5	C18H26O6
C15H26O1	C20H36O7
C12H18O5	C12H18O3
C13H14O3	C18H28O6
C4H10O6	C8H8O1
C17H28O4	C10H10O6
C16H20O2	C16H20O4
C15H24O3	C19H30O8
C9H20O4	C16H18O5
C15H18O4	C13H18O3
C14H16O2	C15H22O7
C17H24O6	C14H16O6
C9H16O1	C9H12O7
C15H18O2	C7H8O6
C5H8O0	C16H26O8
C12H22O2	C13H16O3
C20H32O0	C12H14O6
C12H20O2	C17H24O8
C11H16O5	C18H28O8
C7H12O1	C15H18O6
C18H24O0	C13H22O6
C7H8O4	C12H16O7
C9H8O1	C20H34O4
C10H18O5	C15H26O6
C8H4O3	C19H30O7
C10H8O2	C9H14O7
C20H30O7	C17H20O5
C15H22O5	C15H24O7
C17H24O1	C13H22O7
C16H20O5	C10H20O4
C13H24O4	C11H14O7
C4H6O3	C17H26O8
C17H22O1	C5H10O4
C10H10O4	C13H20O3
C14H16O3	C20H32O9
C12H20O4	C6H10O5
C12H12O3	C18H26O7
C19H24O5	C19H28O6
C4H4O1	C16H26O7
C6H10O3	C17H24O5
C4H8O3	C6H12O4
C18H30O4	C8H14O6
C17H26O6	C14H20O4
C15H18O3	C16H24O8
C11H14O1	C15H20O6
C13H18O1	C19H28O7
C12H18O1	C20H36O6
C17H28O5	C13H14O5
C11H12O1	C14H24O5
C13H22O4	C16H24O6
C18H30O6	C20H32O8
C19H30O2	C15H22O6
C10H12O5	C11H22O2
C19H26O2	C5H10O6
C14H22O2	C11H18O8
C18H26O6	C18H28O7
C19H24O3	C16H22O4
C17H22O5	C14H18O6
C20H34O5	C14H22O5
C16H20O3	C13H14O3
C3H2O2	C15H24O5
C16H20O4	C14H20O5
C22H2O4	C13H20O5
C10H8O3	C13H20O6
C10H18O4	C13H20O7
C18H30O5	C17H26O6
C13H22O3	C12H16O6
C11H12O2	C15H22O2
C12H20O3	C12H14O3
C18H28O3	C11H20O8
C19H28O2	C10H8O4
C20H28O0	C16H22O6
C18H28O6	C20H32O5
C18H24O3	C16H20O6
C17H22O2	C17H22O5
C15H20O3	C13H18O6
C4H4O2	C5H8O5
C8H14O5	C13H16O6
C16H22O2	C6H12O2
C16H22O5	C7H12O1
C6H6O3	C17H22O6
C15H20O4	C3H6O4
C14H18O4	C12H16O3
C18H24O5	C15H20O5
C14H26O4	C9H16O2
C20H28O1	C16H24O7
C11H12O3	C20H30O8
C14H18O2	C12H18O7
C15H24O4	C9H16O6
C19H32O5	C16H22O5
C16H24O5	C14H20O7
C14H20O3	C15H24O6
C17H26O0	C17H24O7
C12H14O2	C17H26O7
C14H22O4	C17H24O6
C14H18O3	C14H20O6
C9H8O3	C12H22O7
C18H24O4	C8H16O2
C19H26O6	C12H20O4
C6H10O1	C20H30O6
C5H6O0	C16H32O2
C13H16O4	C11H16O3
C15H22O3	C15H18O4
C20H26O5	C12H18O4
C15H22O4	C11H12O5
C20H26O2	C6H12O3
C20H30O1	C13H18O5
C14H20O4	C11H12O3
C13H18O4	C2H2O4
C18H32O6	C8H14O2
C10H18O1	C8H4O4
C9H12O5	C7H10O6
C5H8O1	C10H18O7
C20H34O4	C14H18O5
C12H18O4	C10H20O2
C17H22O4	C20H32O7
C17H22O3	C4H8O1
C19H30O6	C13H14O4
C13H16O2	C2H6O4
C9H8O2	C7H14O2
C12H18O2	C5H6O5
C19H24O4	C20H34O8
C13H20O4	C9H10O6
C14H20O2	C13H18O4
C3H6O2	C20H30O7
C14H22O3	C8H12O6
C8H14O1	C10H8O3
C13H18O3	C14H24O6
C11H18O4	C1H4O4
C12H14O3	C5H10O5
C18H26O7	C12H16O4
C9H8O0	C12H14O5
C7H6O3	C14H16O4
C11H16O1	C9H16O1
C12H22O6	C6H8O5
C13H20O3	C12H16O5
C16H22O3	C8H6O4
C8H14O4	C14H22O6
C15H22O2	C8H10O6
C7H10O4	C13H16O5
C12H16O2	C10H14O7
C20H28O6	C7H6O5
C4H8O2	C9H8O5
C6H6O0	C14H16O5
C20H26O3	C11H14O6
C20H30O0	C15H18O5
C12H16O3	C5H6O1
C9H10O4	C20H32O6
C16H24O4	C9H8O2
C5H6O1	C5H4O2
C19H28O6	C11H18O4
C17H26O5	C10H16O7
C15H20O2	C10H16O1
C9H16O2	C6H6O5
C20H26O4	C20H34O5
C5H8O2	C6H10O1
C19H30O3	C9H16O5
C17H24O5	C11H12O4
C7H12O2	C20H34O6
C17H24O0	C20H34O7
C12H16O4	C16H20O5
C10H14O5	C12H22O6
C13H16O3	C14H18O4
C17H24O2	C3H2O2
C11H18O2	C8H8O5
C10H18O3	C8H6O3
C8H8O1	C9H14O1
C6H8O3	C10H10O5
C7H12O3	C13H20O4
C7H6O1	C11H20O7
C17H24O3	C10H18O6
C11H14O3	C10H12O6
C17H26O3	C12H18O5
C20H32O6	C12H20O7
C11H14O4	C7H10O1
C7H14O5	C12H22O5
C13H20O2	C11H14O5
C6H10O2	C11H14O3
C8H10O4	C6H4O4
C11H16O4	C4H4O4
C10H16O5	C4H6O1
C18H28O5	C12H20O5
C8H12O4	C11H16O7
C12H18O3	C7H12O5
C23H2O3	C12H18O6
C8H16O4	C11H14O4
C16H24O3	C2H4O4
C12H22O5	C9H14O6
C4H6O2	C5H10O3
C20H30O6	C9H12O6
C18H28O4	C11H16O4
C19H26O3	C6H4O3
C4H6O1	C7H12O2
C12H14O4	C6H8O1
C17H24O4	C9H16O4
C19H26O5	C8H14O5
C10H18O2	C13H16O4
C7H6O2	C4H4O2
C17H26O4	C8H12O1
C5H6O2	C5H8O1
C7H6O0	C11H18O7
C6H6O1	C3H4O4
C9H18O5	C11H20O5
C18H26O4	C3H6O1
C20H28O2	C9H10O1
C20H28O5	C8H10O1
C9H16O4	C9H12O1
C9H14O4	C11H18O5
C8H8O2	C12H20O6
C10H10O3	C10H20O3
C11H18O3	C8H10O5
C8H14O3	C12H14O4
C8H8O3	C11H16O6
C19H26O4	C9H8O4
C6H10O0	C10H14O1
C19H30O5	C5H4O4
C20H32O2	C7H8O5
C6H6O2	C11H18O6
C8H8O0	C11H20O6
C7H8O3	C10H14O6
C16H22O4	C4H8O4
C8H16O3	C8H12O5
C11H14O2	C6H6O1
C20H30O2	C9H10O5
C19H30O4	C9H16O3
C8H14O2	C10H10O4
C10H10O2	C10H18O2
C10H12O4	C7H10O5
C20H28O3	C10H18O5
C6H8O2	C8H8O4
C19H28O3	C10H16O6
C20H32O3	C3H6O2
C19H28O5	C11H16O5
C10H10O0	C10H18O4
C11H16O2	C6H10O2
C11H16O3	C1H2O3
C10H10O1	C9H18O2
C9H10O0	C9H14O2
C9H12O4	C5H4O3
C20H28O4	C10H10O3
C7H10O3	C7H12O3
C8H10O3	C7H12O4
C20H32O5	C7H6O4
C9H10O3	C4H4O3
C3H6O1	C8H14O3
C8H12O0	C2H2O3
C19H28O4	C5H6O4
C20H30O5	C8H14O4
C10H16O4	C3H6O3
C6H8O0	C10H12O1
C10H14O4	C10H12O5
C9H16O3	C4H6O4
C8H12O1	C5H8O4
C6H8O1	C6H6O4
C20H30O4	C10H10O2
C10H16O0	C5H6O2
C7H8O2	C9H14O5
C7H10O1	C10H18O3
C8H12O3	C9H12O5
C9H10O1	C5H8O2
C10H12O3	C9H8O3
C9H14O1	C2H4O3
C7H8O1	C8H12O2
C20H30O3	C4H8O2
C8H10O2	C8H12O4
C8H12O2	C6H6O2
C8H10O1	C8H8O3
C9H12O3	C8H10O2
C7H10O2	C1H2O4
C20H32O4	C6H10O3
C9H14O3	C6H8O4
C10H12O0	C8H12O3
C7H10O0	C8H8O2
C9H12O0	C9H10O4
C7H8O0	C10H14O5
C9H10O2	C10H16O5
C9H14O0	C8H10O4
C10H16O3	C6H10O4
C8H10O0	C4H6O3
C10H12O1	C3H4O2
C9H12O1	C10H12O4
C10H14O0	C7H8O1
C10H12O2	C6H6O3
C10H16O1	C5H8O3
C10H14O3	C4H8O3
C10H14O1	C9H14O4
C10H14O2	C3H4O3
C9H12O2	C7H6O3
C9H14O2	C7H8O4
C10H16O2	C9H14O3
	C10H12O3
	C5H10O2
	C9H10O3
	C7H10O2
	C8H10O3
	C10H12O2
	C10H16O2
	C10H14O4
	C9H12O2
	C9H12O4
	C9H10O2
	C5H6O3
	C7H10O4
	C7H10O3
	C6H8O2
	C10H14O2
	C6H8O3
	C4H6O2
	C7H8O3
	C7H6O2
	C10H16O4
	C10H14O3
	C10H16O3
	C7H8O2
	C9H12O3
	C2H4O2

## Sheet: Limonene HESI
HESI+	HESI-
C28H38O0	C10H10O2
C18H20O3	C10H10O3
C26H8O10	C10H10O4
C12H6O3	C10H10O5
C15H18O6	C10H10O6
C25H40O9	C10H10O7
C5H10O3	C10H10O8
C15H16O5	C10H10O9
C10H12O6	C10H12O0
C26H38O1	C10H12O1
C24H40O5	C10H12O2
C19H40O3	C10H12O3
C14H14O0	C10H12O4
C7H16O5	C10H12O5
C30H38O5	C10H12O6
C16H28O7	C10H12O7
C9H6O3	C10H12O8
C17H18O3	C10H12O9
C16H18O0	C10H14O0
C16H18O6	C10H14O1
C17H30O5	C10H14O10
C9H18O1	C10H14O2
C11H20O6	C10H14O3
C11H10O0	C10H14O4
C24H36O4	C10H14O5
C11H16O6	C10H14O6
C13H16O6	C10H14O7
C23H32O4	C10H14O8
C23H40O8	C10H14O9
C24H36O6	C10H16O1
C29H44O5	C10H16O10
C28H32O5	C10H16O2
C10H20O5	C10H16O3
C9H6O2	C10H16O4
C11H20O11	C10H16O5
C15H26O3	C10H16O6
C24H38O8	C10H16O7
C6H12O2	C10H16O8
C19H32O8	C10H16O9
C12H14O6	C10H18O2
C15H26O6	C10H18O3
C21H28O3	C10H18O4
C16H30O5	C10H18O5
C26H8O8	C10H18O6
C24H34O5	C10H18O7
C16H28O4	C10H18O8
C16H26O7	C10H18O9
C22H34O7	C10H20O2
C8H6O1	C10H20O3
C21H30O3	C10H20O4
C23H34O5	C10H20O5
C7H14O3	C10H20O6
C4H4O0	C10H20O7
C19H22O4	C10H20O8
C11H20O5	C10H2O7
C30H46O4	C10H4O6
C11H10O3	C10H4O7
C6H14O3	C10H4O8
C15H26O5	C10H4O9
C15H16O4	C10H6O4
C13H24O3	C10H6O5
C13H14O5	C10H6O6
C6H10O4	C10H6O7
C27H40O0	C10H6O8
C19H22O3	C10H8O2
C21H26O15	C10H8O3
C14H14O1	C10H8O4
C23H34O6	C10H8O5
C3H6O3	C10H8O6
C8H16O1	C10H8O7
C17H28O7	C10H8O8
C13H24O2	C11H10O2
C14H14O2	C11H10O3
C3H2O1	C11H10O4
C5H8O4	C11H10O5
C12H18O6	C11H10O6
C8H16O5	C11H10O7
C27H42O5	C11H10O8
C14H14O3	C11H10O9
C12H24O4	C11H12O10
C8H10O5	C11H12O2
C14H24O6	C11H12O3
C11H18O6	C11H12O4
C12H22O2	C11H12O5
C18H30O3	C11H12O6
C16H26O6	C11H12O7
C14H16O0	C11H12O8
C20H24O2	C11H12O9
C9H20O4	C11H14O10
C8H18O3	C11H14O11
C16H30O6	C11H14O2
C16H18O1	C11H14O3
C15H20O6	C11H14O4
C14H20O0	C11H14O5
C19H32O3	C11H14O6
C15H16O2	C11H14O7
C15H22O0	C11H14O8
C18H28O2	C11H14O9
C9H18O3	C11H16O10
C12H12O1	C11H16O11
C12H22O3	C11H16O2
C15H22O6	C11H16O3
C19H24O1	C11H16O4
C18H32O5	C11H16O5
C10H20O3	C11H16O6
C20H24O3	C11H16O7
C14H22O6	C11H16O8
C9H16O5	C11H16O9
C15H16O3	C11H18O10
C7H12O4	C11H18O11
C15H24O6	C11H18O14
C17H24O7	C11H18O2
C15H22O1	C11H18O3
C10H8O1	C11H18O4
C4H6O0	C11H18O5
C8H16O2	C11H18O6
C14H18O0	C11H18O7
C11H20O2	C11H18O8
C17H28O3	C11H18O9
C14H24O5	C11H20O10
C5H4O1	C11H20O11
C6H8O4	C11H20O2
C18H22O2	C11H20O3
C9H8O4	C11H20O4
C26H20O0	C11H20O5
C3H4O1	C11H20O6
C11H10O2	C11H20O7
C8H14O0	C11H20O8
C16H26O3	C11H20O9
C10H8O3	C11H22O2
C14H24O4	C11H22O3
C8H12O5	C11H22O6
C4H8O1	C11H22O7
C5H10O1	C11H22O8
C14H20O1	C11H4O2
C16H18O2	C11H4O6
C4H8O0	C11H4O7
C14H16O5	C11H6O6
C7H6O4	C11H6O7
C13H20O0	C11H6O8
C17H20O4	C11H6O9
C9H16O0	C11H8O3
C18H22O4	C11H8O4
C19H26O1	C11H8O5
C7H12O0	C11H8O6
C19H24O5	C11H8O7
C11H18O0	C11H8O8
C4H8O4	C12H10O4
C14H26O4	C12H10O5
C8H18O2	C12H10O6
C16H26O5	C12H10O7
C20H34O3	C12H10O8
C17H28O6	C12H10O9
C2H4O2	C12H12O0
C14H18O5	C12H12O10
C12H20O6	C12H12O2
C12H20O5	C12H12O3
C4H8O3	C12H12O4
C5H8O3	C12H12O5
C11H18O1	C12H12O6
C10H8O2	C12H12O7
C8H8O4	C12H12O8
C8H4O3	C12H12O9
C15H18O5	C12H14O10
C19H24O2	C12H14O11
C11H12O0	C12H14O2
C9H6O0	C12H14O3
C16H22O0	C12H14O4
C15H20O5	C12H14O5
C16H26O4	C12H14O6
C15H24O3	C12H14O7
C5H6O3	C12H14O8
C12H6O1	C12H14O9
C15H18O4	C12H16O10
C12H14O1	C12H16O11
C4H6O3	C12H16O2
C20H26O0	C12H16O3
C18H30O6	C12H16O4
C15H24O4	C12H16O5
C6H10O3	C12H16O6
C14H18O1	C12H16O7
C8H14O5	C12H16O8
C12H18O5	C12H16O9
C12H20O4	C12H18O10
C11H14O0	C12H18O11
C5H4O2	C12H18O12
C4H10O6	C12H18O2
C17H28O4	C12H18O3
C13H16O1	C12H18O4
C19H24O3	C12H18O5
C15H22O5	C12H18O6
C16H20O4	C12H18O7
C14H16O2	C12H18O8
C20H26O1	C12H18O9
C4H4O1	C12H20O10
C12H16O0	C12H20O11
C16H20O2	C12H20O2
C15H18O3	C12H20O3
C19H24O4	C12H20O4
C11H16O0	C12H20O5
C5H8O0	C12H20O6
C11H16O5	C12H20O7
C12H16O1	C12H20O8
C9H8O3	C12H20O9
C16H20O3	C12H22O10
C7H12O1	C12H22O2
C19H32O5	C12H22O3
C12H22O6	C12H22O4
C16H22O5	C12H22O5
C11H12O2	C12H22O6
C15H20O4	C12H22O7
C9H8O1	C12H22O8
C4H4O2	C12H22O9
C17H22O1	C12H24O2
C3H2O2	C12H24O3
C9H8O2	C12H24O6
C12H14O2	C12H6O6
C15H22O4	C12H6O7
C8H14O4	C12H6O8
C13H18O1	C12H8O6
C15H20O3	C12H8O7
C16H24O5	C12H8O8
C14H18O4	C12H8O9
C17H22O2	C13H10O10
C13H18O2	C13H10O6
C13H22O4	C13H10O7
C6H6O3	C13H10O8
C3H6O2	C13H10O9
C20H26O2	C13H12O10
C17H26O2	C13H12O3
C11H14O1	C13H12O4
C20H26O3	C13H12O5
C9H8O0	C13H12O6
C12H18O1	C13H12O7
C13H18O0	C13H12O8
C4H8O2	C13H12O9
C5H6O0	C13H14O10
C9H18O5	C13H14O11
C12H14O3	C13H14O2
C20H34O4	C13H14O3
C20H28O0	C13H14O4
C16H24O0	C13H14O5
C5H8O1	C13H14O6
C6H10O1	C13H14O7
C19H28O6	C13H14O8
C6H6O0	C13H14O9
C5H8O2	C13H16O10
C11H18O2	C13H16O11
C7H6O3	C13H16O2
C20H28O1	C13H16O3
C16H22O3	C13H16O4
C23H2O3	C13H16O5
C9H10O4	C13H16O6
C7H12O3	C13H16O7
C12H16O2	C13H16O8
C7H6O1	C13H16O9
C16H24O4	C13H18O10
C11H16O1	C13H18O11
C8H12O4	C13H18O12
C8H8O1	C13H18O2
C5H6O1	C13H18O3
C8H16O4	C13H18O4
C7H10O4	C13H18O5
C10H16O5	C13H18O6
C10H14O5	C13H18O7
C18H28O5	C13H18O8
C4H6O2	C13H18O9
C20H30O6	C13H20O10
C20H34O5	C13H20O11
C7H6O2	C13H20O12
C20H28O5	C13H20O2
C4H6O1	C13H20O3
C19H26O3	C13H20O4
C17H24O3	C13H20O5
C6H10O0	C13H20O6
C5H6O2	C13H20O7
C16H24O3	C13H20O8
C19H26O4	C13H20O9
C6H10O2	C13H22O10
C17H26O4	C13H22O11
C17H24O2	C13H22O12
C10H10O3	C13H22O2
C17H26O3	C13H22O3
C10H18O3	C13H22O4
C19H30O5	C13H22O5
C16H22O4	C13H22O6
C8H8O2	C13H22O7
C20H28O3	C13H22O8
C8H8O0	C13H22O9
C20H28O2	C13H24O10
C10H10O2	C13H24O3
C7H6O0	C13H24O4
C8H14O2	C13H24O5
C6H6O2	C13H24O6
C9H14O4	C13H24O7
C8H8O3	C13H24O8
C19H28O3	C13H24O9
C6H8O2	C13H26O2
C11H14O2	C13H26O8
C10H10O1	C13H6O6
C6H6O1	C13H6O7
C10H10O0	C13H6O8
C3H6O1	C13H8O10
C20H30O5	C13H8O6
C20H32O2	C13H8O7
C19H30O4	C13H8O8
C8H10O3	C13H8O9
C9H10O3	C14H10O10
C19H28O4	C14H10O7
C9H12O4	C14H10O8
C9H10O0	C14H10O9
C20H32O5	C14H12O10
C7H10O3	C14H12O6
C20H30O2	C14H12O7
C20H32O3	C14H12O8
C6H8O0	C14H12O9
C8H12O0	C14H14O10
C6H8O1	C14H14O11
C20H30O3	C14H14O3
C9H10O1	C14H14O4
C10H12O3	C14H14O5
C9H16O3	C14H14O6
C8H10O2	C14H14O7
C7H8O2	C14H14O8
C9H14O1	C14H14O9
C11H16O2	C14H16O10
C8H12O1	C14H16O11
C7H8O1	C14H16O12
C10H16O0	C14H16O3
C7H10O1	C14H16O4
C8H10O1	C14H16O5
C7H10O0	C14H16O6
C9H12O3	C14H16O7
C10H12O0	C14H16O8
C9H12O0	C14H16O9
C9H14O0	C14H18O10
C7H8O0	C14H18O11
C7H10O2	C14H18O12
C9H10O2	C14H18O2
C10H12O1	C14H18O3
C10H12O2	C14H18O4
C8H10O0	C14H18O5
C10H16O3	C14H18O6
C9H12O1	C14H18O7
C10H14O3	C14H18O8
C10H14O1	C14H18O9
C10H14O2	C14H20O10
C9H12O2	C14H20O11
C0H0O0	C14H20O12
C12H10O4	C14H20O2
C12H20O0	C14H20O3
C13H20O7	C14H20O4
C28H46O12	C14H20O5
C30H12O5	C14H20O6
C25H38O3	C14H20O7
C27H46O9	C14H20O8
C25H20O0	C14H20O9
C8H6O4	C14H22O10
C13H24O1	C14H22O11
C14H30O3	C14H22O12
C15H16O0	C14H22O3
C26H40O4	C14H22O4
C22H38O10	C14H22O5
C11H10O5	C14H22O6
C19H20O1	C14H22O7
C24H40O4	C14H22O8
C10H20O4	C14H22O9
C28H46O6	C14H24O10
C17H16O2	C14H24O11
C14H26O6	C14H24O12
C24H42O5	C14H24O4
C16H14O0	C14H24O5
C11H20O1	C14H24O6
C15H28O4	C14H24O7
C11H8O2	C14H24O8
C27H26O0	C14H24O9
C28H44O5	C14H26O10
C24H24O0	C14H26O11
C23H28O5	C14H26O2
C7H10O5	C14H26O3
C17H28O1	C14H26O4
C30H50O9	C14H26O5
C25H44O9	C14H26O6
C14H24O7	C14H26O7
C13H24O5	C14H26O8
C22H32O3	C14H26O9
C19H34O4	C14H28O2
C18H14O3	C14H28O7
C20H30O10	C14H4O7
C10H18O6	C14H6O8
C19H34O3	C14H6O9
C25H24O1	C14H8O8
C28H42O4	C14H8O9
C20H38O4	C15H10O10
C29H48O10	C15H10O7
C28H46O9	C15H10O8
C23H32O3	C15H10O9
C19H20O4	C15H12O10
C23H32O2	C15H12O11
C13H22O0	C15H12O7
C27H44O8	C15H12O8
C27H50O10	C15H12O9
C15H14O0	C15H14O10
C14H12O2	C15H14O11
C21H26O2	C15H14O6
C26H42O9	C15H14O7
C25H42O9	C15H14O8
C16H28O9	C15H14O9
C14H12O0	C15H16O10
C15H28O6	C15H16O11
C24H34O3	C15H16O12
C27H40O1	C15H16O3
C16H16O5	C15H16O4
C23H34O2	C15H16O5
C24H38O10	C15H16O6
C27H38O3	C15H16O7
C9H12O6	C15H16O8
C29H42O3	C15H16O9
C25H40O4	C15H18O10
C10H14O7	C15H18O11
C19H20O3	C15H18O12
C13H22O1	C15H18O3
C12H20O13	C15H18O4
C22H34O3	C15H18O5
C18H34O2	C15H18O6
C26H42O6	C15H18O7
C20H32O10	C15H18O8
C21H34O2	C15H18O9
C18H32O2	C15H20O10
C27H44O5	C15H20O11
C23H40O9	C15H20O12
C27H38O2	C15H20O13
C15H26O7	C15H20O3
C20H36O7	C15H20O4
C23H34O3	C15H20O5
C22H38O9	C15H20O6
C24H40O9	C15H20O7
C25H40O5	C15H20O8
C14H26O3	C15H20O9
C25H36O3	C15H22O10
C26H38O3	C15H22O11
C17H30O2	C15H22O12
C29H48O9	C15H22O13
C27H44O7	C15H22O2
C17H30O4	C15H22O3
C20H20O4	C15H22O4
C29H44O3	C15H22O5
C21H30O1	C15H22O6
C18H32O1	C15H22O7
C24H32O4	C15H22O8
C23H38O4	C15H22O9
C25H40O10	C15H24O10
C20H36O6	C15H24O11
C19H34O2	C15H24O12
C12H20O1	C15H24O13
C28H46O7	C15H24O4
C25H34O4	C15H24O5
C22H42O7	C15H24O6
C12H18O7	C15H24O7
C16H30O4	C15H24O8
C26H36O4	C15H24O9
C20H22O3	C15H26O10
C19H32O2	C15H26O11
C9H14O6	C15H26O12
C7H12O8	C15H26O4
C30H42O4	C15H26O5
C27H42O3	C15H26O6
C25H42O6	C15H26O7
C25H44O4	C15H26O8
C25H42O8	C15H26O9
C26H44O10	C15H28O10
C25H42O7	C15H28O11
C13H22O6	C15H28O3
C30H50O5	C15H28O4
C26H38O9	C15H28O5
C19H36O2	C15H28O6
C16H26O1	C15H28O7
C16H28O2	C15H28O8
C8H6O3	C15H28O9
C23H38O5	C15H30O2
C15H26O8	C15H8O7
C30H46O10	C15H8O8
C25H42O4	C15H8O9
C25H40O6	C16H10O7
C26H36O5	C16H10O8
C30H44O2	C16H10O9
C12H24O5	C16H12O10
C23H38O8	C16H12O11
C21H34O3	C16H12O8
C12H10O3	C16H12O9
C17H28O8	C16H14O10
C25H38O4	C16H14O11
C29H48O8	C16H14O7
C12H10O1	C16H14O8
C29H46O9	C16H14O9
C23H34O0	C16H16O10
C23H36O4	C16H16O11
C15H14O2	C16H16O12
C11H22O5	C16H16O4
C22H38O7	C16H16O5
C10H8O4	C16H16O6
C16H16O0	C16H16O7
C26H42O8	C16H16O8
C20H36O5	C16H16O9
C12H22O7	C16H18O10
C26H38O4	C16H18O11
C28H42O5	C16H18O12
C28H44O6	C16H18O3
C21H30O2	C16H18O4
C22H28O15	C16H18O5
C14H12O3	C16H18O6
C16H28O8	C16H18O7
C16H30O2	C16H18O8
C25H44O5	C16H18O9
C14H22O7	C16H20O10
C27H42O9	C16H20O11
C25H22O1	C16H20O12
C17H30O3	C16H20O13
C16H28O5	C16H20O3
C23H38O7	C16H20O4
C21H36O7	C16H20O5
C29H42O4	C16H20O6
C16H26O8	C16H20O7
C21H36O5	C16H20O8
C30H42O5	C16H20O9
C23H36O8	C16H22O10
C25H40O8	C16H22O11
C17H18O5	C16H22O12
C21H32O1	C16H22O13
C25H36O4	C16H22O3
C27H44O6	C16H22O4
C26H42O7	C16H22O5
C25H38O8	C16H22O6
C19H30O0	C16H22O7
C29H48O6	C16H22O8
C14H14O5	C16H22O9
C30H48O9	C16H24O1
C21H36O8	C16H24O10
C25H26O13	C16H24O11
C14H24O1	C16H24O12
C18H30O2	C16H24O13
C12H12O5	C16H24O2
C20H22O2	C16H24O4
C24H20O0	C16H24O5
C16H16O4	C16H24O6
C13H12O4	C16H24O7
C18H32O3	C16H24O8
C30H46O2	C16H24O9
C15H24O7	C16H26O10
C29H46O4	C16H26O11
C28H40O6	C16H26O12
C25H38O6	C16H26O13
C16H28O3	C16H26O5
C26H36O6	C16H26O6
C26H40O8	C16H26O7
C26H44O7	C16H26O8
C25H38O5	C16H26O9
C25H40O7	C16H28O10
C24H40O7	C16H28O11
C24H32O5	C16H28O12
C25H42O5	C16H28O4
C19H26O8	C16H28O5
C25H24O0	C16H28O6
C27H40O2	C16H28O7
C12H10O2	C16H28O8
C17H32O2	C16H28O9
C25H34O5	C16H30O10
C16H16O1	C16H30O2
C20H22O1	C16H30O3
C30H50O8	C16H30O4
C28H40O7	C16H30O6
C26H44O9	C16H30O7
C23H38O6	C16H30O8
C15H14O3	C16H30O9
C11H14O6	C16H32O2
C24H38O7	C16H32O3
C27H38O4	C16H34O12
C17H22O7	C16H34O13
C24H40O6	C16H6O8
C22H36O5	C16H6O9
C12H10O0	C16H8O7
C26H40O5	C16H8O8
C28H42O8	C16H8O9
C18H32O4	C17H10O8
C17H30O8	C17H10O9
C27H42O4	C17H12O10
C16H16O2	C17H12O11
C27H40O3	C17H12O8
C22H34O4	C17H12O9
C15H14O1	C17H14O10
C19H22O1	C17H14O11
C14H16O6	C17H14O8
C27H38O5	C17H14O9
C18H28O0	C17H16O10
C29H48O7	C17H16O11
C22H34O8	C17H16O12
C10H10O5	C17H16O7
C24H38O5	C17H16O8
C27H42O8	C17H16O9
C14H18O6	C17H18O10
C17H30O7	C17H18O11
C16H22O7	C17H18O12
C11H10O4	C17H18O4
C28H44O8	C17H18O5
C12H16O6	C17H18O6
C25H38O7	C17H18O7
C27H38O6	C17H18O8
C20H32O9	C17H18O9
C20H38O3	C17H20O10
C18H20O4	C17H20O11
C12H20O7	C17H20O12
C13H12O1	C17H20O13
C20H36O4	C17H20O3
C23H34O4	C17H20O4
C26H44O8	C17H20O5
C21H36O6	C17H20O6
C20H40O4	C17H20O7
C20H34O2	C17H20O8
C15H24O0	C17H20O9
C28H44O7	C17H22O10
C17H28O2	C17H22O11
C25H36O5	C17H22O12
C22H42O4	C17H22O3
C27H38O7	C17H22O4
C16H16O3	C17H22O5
C24H38O6	C17H22O6
C26H40O6	C17H22O7
C29H42O5	C17H22O8
C30H44O3	C17H22O9
C17H30O6	C17H24O10
C12H22O4	C17H24O11
C23H36O5	C17H24O12
C11H20O3	C17H24O13
C22H36O6	C17H24O14
C21H32O2	C17H24O3
C15H30O3	C17H24O4
C24H36O5	C17H24O5
C28H42O6	C17H24O6
C18H28O1	C17H24O7
C23H36O7	C17H24O8
C25H36O6	C17H24O9
C22H38O8	C17H26O10
C13H28O4	C17H26O11
C17H20O6	C17H26O12
C13H12O0	C17H26O13
C27H40O8	C17H26O14
C22H36O7	C17H26O3
C15H26O4	C17H26O4
C22H32O4	C17H26O5
C26H40O7	C17H26O6
C12H22O14	C17H26O7
C17H18O4	C17H26O8
C11H20O4	C17H26O9
C26H38O7	C17H28O10
C26H38O5	C17H28O11
C9H10O5	C17H28O12
C27H40O4	C17H28O13
C24H22O0	C17H28O5
C22H36O8	C17H28O6
C28H42O7	C17H28O7
C13H20O6	C17H28O8
C18H24O7	C17H28O9
C10H16O6	C17H30O10
C27H40O5	C17H30O11
C14H22O0	C17H30O12
C13H24O4	C17H30O5
C29H42O7	C17H30O6
C29H42O6	C17H30O7
C18H22O0	C17H30O8
C22H34O5	C17H30O9
C30H44O7	C17H32O10
C13H22O5	C17H32O11
C13H12O3	C17H32O12
C27H42O7	C17H32O6
C18H20O2	C17H32O7
C30H46O8	C17H32O8
C17H18O0	C17H32O9
C24H34O4	C17H34O11
C26H38O6	C17H34O12
C29H44O4	C17H34O13
C29H46O5	C17H34O2
C21H32O8	C17H34O4
C11H12O5	C17H36O11
C23H36O6	C17H36O12
C27H40O7	C17H36O13
C30H46O3	C17H38O12
C30H48O8	C17H6O10
C22H32O5	C17H6O9
C20H28O8	C17H8O8
C29H44O8	C17H8O9
C13H18O6	C18H12O10
C20H36O3	C18H12O8
C29H46O8	C18H12O9
C15H24O15	C18H14O10
C16H20O6	C18H14O11
C14H26O2	C18H14O8
C19H28O8	C18H14O9
C17H18O1	C18H16O10
C19H30O1	C18H16O11
C16H28O6	C18H16O12
C17H18O2	C18H16O7
C14H24O2	C18H16O8
C22H34O6	C18H16O9
C12H26O5	C18H18O10
C15H28O3	C18H18O11
C10H18O5	C18H18O12
C19H30O8	C18H18O6
C18H30O8	C18H18O7
C11H10O1	C18H18O8
C27H40O6	C18H18O9
C7H8O4	C18H20O10
C24H38O4	C18H20O11
C30H44O6	C18H20O12
C30H50O6	C18H20O13
C21H32O3	C18H20O5
C27H42O6	C18H20O6
C14H14O4	C18H20O7
C15H16O1	C18H20O8
C13H12O2	C18H20O9
C15H24O1	C18H22O10
C10H14O6	C18H22O11
C30H48O4	C18H22O12
C20H32O8	C18H22O13
C30H44O5	C18H22O4
C18H22O5	C18H22O5
C13H22O2	C18H22O6
C14H24O3	C18H22O7
C29H46O7	C18H22O8
C21H34O7	C18H22O9
C12H20O2	C18H24O10
C29H44O7	C18H24O11
C30H50O7	C18H24O12
C30H44O4	C18H24O13
C17H22O6	C18H24O4
C19H24O6	C18H24O5
C21H32O7	C18H24O6
C15H20O0	C18H24O7
C29H46O6	C18H24O8
C15H24O5	C18H24O9
C29H44O6	C18H26O10
C17H20O5	C18H26O11
C19H32O7	C18H26O12
C13H20O1	C18H26O13
C30H46O7	C18H26O14
C16H26O2	C18H26O4
C17H26O7	C18H26O5
C20H24O4	C18H26O6
C20H24O0	C18H26O7
C15H18O0	C18H26O8
C21H30O4	C18H26O9
C16H18O5	C18H28O10
C12H12O0	C18H28O11
C12H14O5	C18H28O12
C20H30O8	C18H28O13
C12H18O0	C18H28O14
C21H30O5	C18H28O15
C18H26O0	C18H28O4
C10H18O1	C18H28O5
C12H12O4	C18H28O6
C13H16O5	C18H28O7
C9H14O5	C18H28O8
C18H32O7	C18H28O9
C21H34O4	C18H30O10
C16H22O6	C18H30O11
C19H26O7	C18H30O12
C30H48O7	C18H30O13
C18H26O1	C18H30O5
C18H30O7	C18H30O6
C21H32O4	C18H30O7
C16H20O0	C18H30O8
C14H22O5	C18H30O9
C11H18O5	C18H32O10
C15H28O2	C18H32O11
C18H24O1	C18H32O12
C21H34O6	C18H32O5
C12H16O5	C18H32O6
C18H24O6	C18H32O7
C16H24O6	C18H32O8
C20H26O6	C18H32O9
C20H34O7	C18H34O10
C14H20O5	C18H34O11
C14H22O1	C18H34O6
C10H16O10	C18H34O7
C13H18O5	C18H34O8
C12H20O3	C18H34O9
C30H46O6	C18H36O2
C18H22O3	C19H14O10
C15H26O2	C19H14O8
C30H46O5	C19H14O9
C16H18O3	C19H16O10
C10H18O4	C19H16O11
C16H18O4	C19H16O12
C15H24O2	C19H16O8
C13H20O5	C19H16O9
C13H14O4	C19H18O10
C19H26O0	C19H18O11
C14H16O1	C19H18O12
C30H48O6	C19H18O7
C13H14O0	C19H18O8
C19H32O4	C19H18O9
C20H34O8	C19H20O10
C9H16O2	C19H20O11
C20H24O1	C19H20O12
C13H14O1	C19H20O13
C19H32O6	C19H20O6
C11H14O5	C19H20O7
C21H32O6	C19H20O8
C21H32O5	C19H20O9
C11H12O4	C19H22O10
C12H12O2	C19H22O11
C15H20O1	C19H22O12
C13H22O3	C19H22O13
C18H30O5	C19H22O4
C9H12O5	C19H22O5
C19H30O7	C19H22O6
C17H20O0	C19H22O7
C17H20O1	C19H22O8
C17H28O5	C19H22O9
C18H30O4	C19H24O10
C10H12O5	C19H24O11
C10H10O4	C19H24O12
C16H24O1	C19H24O13
C20H28O7	C19H24O4
C14H22O2	C19H24O5
C16H20O1	C19H24O6
C15H18O1	C19H24O7
C19H28O7	C19H24O8
C14H16O4	C19H24O9
C8H16O3	C19H26O10
C16H20O5	C19H26O11
C17H20O3	C19H26O12
C17H24O6	C19H26O13
C18H32O6	C19H26O14
C16H24O2	C19H26O4
C17H26O1	C19H26O5
C17H22O5	C19H26O6
C18H24O0	C19H26O7
C14H22O4	C19H26O8
C12H14O0	C19H26O9
C20H32O1	C19H28O10
C19H28O0	C19H28O11
C20H32O7	C19H28O12
C12H12O3	C19H28O13
C13H14O2	C19H28O14
C13H16O0	C19H28O15
C13H14O3	C19H28O3
C18H24O5	C19H28O4
C18H24O2	C19H28O5
C30H48O5	C19H28O6
C19H28O1	C19H28O7
C8H14O3	C19H28O8
C15H18O2	C19H28O9
C15H26O1	C19H30O10
C17H26O6	C19H30O11
C21H34O5	C19H30O12
C13H20O4	C19H30O13
C14H22O3	C19H30O14
C20H34O6	C19H30O15
C19H26O6	C19H30O4
C20H26O5	C19H30O5
C14H20O3	C19H30O6
C11H12O3	C19H30O7
C13H18O4	C19H30O8
C20H30O7	C19H30O9
C15H22O3	C19H32O10
C11H18O4	C19H32O11
C17H20O2	C19H32O12
C18H28O3	C19H32O13
C8H10O4	C19H32O14
C18H24O3	C19H32O5
C14H16O3	C19H32O6
C12H18O2	C19H32O7
C12H18O4	C19H32O8
C18H28O6	C19H32O9
C18H26O6	C19H34O10
C14H20O4	C19H34O11
C12H22O5	C19H34O12
C19H30O2	C19H34O5
C22H2O4	C19H34O6
C17H22O4	C19H34O7
C11H12O1	C19H34O8
C13H20O3	C19H34O9
C12H14O4	C19H36O10
C13H16O4	C19H36O5
C9H16O4	C19H36O6
C14H18O3	C19H36O7
C12H18O3	C19H36O8
C13H18O3	C19H36O9
C17H26O0	C1H2O3
C15H22O2	C1H2O4
C14H18O2	C20H16O10
C18H24O4	C20H16O11
C12H16O3	C20H16O8
C11H14O4	C20H16O9
C20H26O4	C20H18O10
C13H16O2	C20H18O11
C13H20O2	C20H18O12
C19H30O6	C20H18O8
C19H26O2	C20H18O9
C20H28O6	C20H20O10
C17H24O5	C20H20O11
C17H26O5	C20H20O12
C14H20O2	C20H20O7
C12H16O4	C20H20O8
C11H14O3	C20H20O9
C17H22O3	C20H22O10
C16H22O1	C20H22O11
C15H20O2	C20H22O12
C17H24O1	C20H22O13
C11H18O3	C20H22O6
C11H16O4	C20H22O7
C13H16O3	C20H22O8
C16H22O2	C20H22O9
C10H18O2	C20H24O10
C18H28O4	C20H24O11
C19H28O2	C20H24O12
C17H22O0	C20H24O13
C19H26O5	C20H24O14
C19H30O3	C20H24O5
C17H24O4	C20H24O6
C11H16O3	C20H24O7
C20H32O0	C20H24O8
C18H26O4	C20H24O9
C20H32O6	C20H26O10
C10H12O4	C20H26O11
C17H24O0	C20H26O12
C19H28O5	C20H26O13
C20H30O1	C20H26O14
C8H12O3	C20H26O4
C20H28O4	C20H26O5
C10H16O4	C20H26O6
C10H14O4	C20H26O7
C20H30O0	C20H26O8
C20H30O4	C20H26O9
C9H14O3	C20H28O10
C20H32O4	C20H28O11
C10H16O1	C20H28O12
C10H16O2	C20H28O13
C9H14O2	C20H28O14
C28H48O12	C20H28O15
C27H38O1	C20H28O4
C28H42O3	C20H28O5
C30H42O1	C20H28O6
C15H6O9	C20H28O7
C14H22O8	C20H28O8
C29H48O5	C20H28O9
C25H42O12	C20H30O10
C30H52O7	C20H30O11
C21H40O2	C20H30O12
C30H46O1	C20H30O13
C21H38O7	C20H30O14
C30H52O6	C20H30O15
C25H42O3	C20H30O4
C25H40O3	C20H30O5
C24H40O3	C20H30O6
C16H32O7	C20H30O7
C14H20O15	C20H30O8
C26H46O6	C20H30O9
C30H50O11	C20H32O10
C26H44O5	C20H32O11
C20H36O2	C20H32O12
C23H36O3	C20H32O13
C16H26O9	C20H32O14
C30H44O1	C20H32O15
C24H42O4	C20H32O4
C30H44O0	C20H32O5
C29H52O7	C20H32O6
C24H38O3	C20H32O7
C28H48O6	C20H32O8
C29H50O7	C20H32O9
C17H28O9	C20H34O10
C26H46O7	C20H34O11
C30H46O0	C20H34O12
C30H42O2	C20H34O13
C23H32O1	C20H34O14
C26H42O4	C20H34O4
C30H50O10	C20H34O5
C26H42O5	C20H34O6
C24H36O3	C20H34O7
C26H40O3	C20H34O8
C22H38O5	C20H34O9
C28H48O11	C20H36O10
C24H42O6	C20H36O11
C26H46O11	C20H36O12
C29H50O10	C20H36O5
C15H26O9	C20H36O6
C29H50O9	C20H36O7
C25H44O11	C20H36O8
C26H44O12	C20H36O9
C25H44O7	C20H38O10
C29H52O10	C20H38O5
C24H42O7	C20H38O6
C23H40O6	C20H38O7
C28H40O5	C20H38O8
C21H36O4	C20H38O9
C26H44O6	C21H16O10
C23H40O7	C21H16O9
C27H46O7	C21H18O10
C25H46O5	C21H18O11
C10H18O11	C21H18O12
C22H36O4	C21H18O8
C30H42O3	C21H18O9
C25H42O11	C21H20O10
C25H44O6	C21H20O11
C26H46O10	C21H20O12
C26H46O8	C21H20O8
C22H38O6	C21H20O9
C27H46O8	C21H22O10
C29H50O8	C21H22O11
C30H48O10	C21H22O12
C25H44O10	C21H22O13
C30H48O3	C21H22O7
C26H44O11	C21H22O8
C28H48O7	C21H22O9
C28H46O8	C21H24O10
C30H46O9	C21H24O11
C29H44O9	C21H24O12
	C21H24O13
	C21H24O7
	C21H24O8
	C21H24O9
	C21H26O10
	C21H26O11
	C21H26O12
	C21H26O13
	C21H26O14
	C21H26O6
	C21H26O7
	C21H26O8
	C21H26O9
	C21H28O10
	C21H28O11
	C21H28O12
	C21H28O13
	C21H28O14
	C21H28O6
	C21H28O7
	C21H28O8
	C21H28O9
	C21H30O10
	C21H30O11
	C21H30O12
	C21H30O13
	C21H30O14
	C21H30O15
	C21H30O6
	C21H30O7
	C21H30O8
	C21H30O9
	C21H32O10
	C21H32O11
	C21H32O12
	C21H32O13
	C21H32O14
	C21H32O15
	C21H32O6
	C21H32O7
	C21H32O8
	C21H32O9
	C21H34O10
	C21H34O11
	C21H34O12
	C21H34O13
	C21H34O14
	C21H34O15
	C21H34O6
	C21H34O7
	C21H34O8
	C21H34O9
	C21H36O10
	C21H36O11
	C21H36O12
	C21H36O13
	C21H36O14
	C21H36O6
	C21H36O7
	C21H36O8
	C21H36O9
	C21H38O10
	C21H38O11
	C21H38O12
	C21H38O6
	C21H38O7
	C21H38O8
	C21H38O9
	C22H18O10
	C22H18O11
	C22H20O10
	C22H20O11
	C22H20O12
	C22H20O9
	C22H22O10
	C22H22O11
	C22H22O12
	C22H22O13
	C22H22O8
	C22H22O9
	C22H24O10
	C22H24O11
	C22H24O12
	C22H24O13
	C22H24O7
	C22H24O8
	C22H24O9
	C22H26O10
	C22H26O11
	C22H26O12
	C22H26O13
	C22H26O14
	C22H26O7
	C22H26O8
	C22H26O9
	C22H28O10
	C22H28O11
	C22H28O12
	C22H28O13
	C22H28O14
	C22H28O7
	C22H28O8
	C22H28O9
	C22H30O10
	C22H30O11
	C22H30O12
	C22H30O13
	C22H30O14
	C22H30O7
	C22H30O8
	C22H30O9
	C22H32O10
	C22H32O11
	C22H32O12
	C22H32O13
	C22H32O14
	C22H32O15
	C22H32O7
	C22H32O8
	C22H32O9
	C22H34O10
	C22H34O11
	C22H34O12
	C22H34O13
	C22H34O14
	C22H34O15
	C22H34O7
	C22H34O8
	C22H34O9
	C22H36O10
	C22H36O11
	C22H36O12
	C22H36O13
	C22H36O14
	C22H36O15
	C22H36O7
	C22H36O8
	C22H36O9
	C22H38O10
	C22H38O11
	C22H38O12
	C22H38O13
	C22H38O6
	C22H38O7
	C22H38O8
	C22H38O9
	C22H40O10
	C22H40O11
	C22H40O12
	C22H40O9
	C22H42O12
	C23H20O10
	C23H20O11
	C23H20O12
	C23H22O10
	C23H22O11
	C23H22O12
	C23H22O8
	C23H22O9
	C23H24O10
	C23H24O11
	C23H24O12
	C23H24O8
	C23H24O9
	C23H26O10
	C23H26O11
	C23H26O12
	C23H26O13
	C23H26O8
	C23H26O9
	C23H28O10
	C23H28O11
	C23H28O12
	C23H28O13
	C23H28O14
	C23H28O8
	C23H28O9
	C23H30O10
	C23H30O11
	C23H30O12
	C23H30O13
	C23H30O14
	C23H30O8
	C23H30O9
	C23H32O10
	C23H32O11
	C23H32O12
	C23H32O13
	C23H32O14
	C23H32O15
	C23H32O8
	C23H32O9
	C23H34O10
	C23H34O11
	C23H34O12
	C23H34O13
	C23H34O14
	C23H34O15
	C23H34O8
	C23H34O9
	C23H36O10
	C23H36O11
	C23H36O12
	C23H36O13
	C23H36O14
	C23H36O15
	C23H36O7
	C23H36O8
	C23H36O9
	C23H38O10
	C23H38O11
	C23H38O12
	C23H38O13
	C23H38O14
	C23H38O15
	C23H38O8
	C23H38O9
	C23H40O10
	C23H40O11
	C23H40O12
	C23H40O13
	C23H40O9
	C23H42O12
	C24H22O10
	C24H22O11
	C24H22O12
	C24H24O10
	C24H24O11
	C24H24O12
	C24H24O13
	C24H24O9
	C24H26O10
	C24H26O11
	C24H26O12
	C24H26O13
	C24H26O9
	C24H28O10
	C24H28O11
	C24H28O12
	C24H28O13
	C24H28O14
	C24H28O9
	C24H30O10
	C24H30O11
	C24H30O12
	C24H30O13
	C24H30O14
	C24H32O10
	C24H32O11
	C24H32O12
	C24H32O13
	C24H32O14
	C24H32O15
	C24H32O9
	C24H34O10
	C24H34O11
	C24H34O12
	C24H34O13
	C24H34O14
	C24H34O15
	C24H34O8
	C24H34O9
	C24H36O10
	C24H36O11
	C24H36O12
	C24H36O13
	C24H36O14
	C24H36O15
	C24H36O7
	C24H36O8
	C24H36O9
	C24H38O10
	C24H38O11
	C24H38O12
	C24H38O13
	C24H38O14
	C24H38O15
	C24H38O7
	C24H38O8
	C24H38O9
	C24H40O10
	C24H40O11
	C24H40O12
	C24H40O13
	C24H40O14
	C24H40O15
	C24H40O8
	C24H40O9
	C24H42O10
	C24H42O11
	C24H42O12
	C24H42O13
	C24H42O9
	C24H8O1
	C25H10O0
	C25H10O1
	C25H12O0
	C25H24O10
	C25H24O11
	C25H24O12
	C25H26O10
	C25H26O11
	C25H26O12
	C25H26O13
	C25H26O9
	C25H28O10
	C25H28O11
	C25H28O12
	C25H28O13
	C25H28O9
	C25H30O10
	C25H30O11
	C25H30O12
	C25H30O13
	C25H30O14
	C25H30O9
	C25H32O10
	C25H32O11
	C25H32O12
	C25H32O13
	C25H32O14
	C25H32O8
	C25H32O9
	C25H34O10
	C25H34O11
	C25H34O12
	C25H34O13
	C25H34O14
	C25H34O15
	C25H34O9
	C25H36O10
	C25H36O11
	C25H36O12
	C25H36O13
	C25H36O14
	C25H36O15
	C25H36O8
	C25H36O9
	C25H38O10
	C25H38O11
	C25H38O12
	C25H38O13
	C25H38O14
	C25H38O15
	C25H38O8
	C25H38O9
	C25H40O10
	C25H40O11
	C25H40O12
	C25H40O13
	C25H40O14
	C25H40O15
	C25H40O8
	C25H40O9
	C25H42O10
	C25H42O11
	C25H42O12
	C25H42O13
	C25H42O14
	C25H42O9
	C26H26O11
	C26H26O12
	C26H28O10
	C26H28O11
	C26H28O12
	C26H28O13
	C26H30O10
	C26H30O11
	C26H30O12
	C26H30O13
	C26H30O9
	C26H32O10
	C26H32O11
	C26H32O12
	C26H32O13
	C26H32O14
	C26H32O9
	C26H34O10
	C26H34O11
	C26H34O12
	C26H34O13
	C26H34O14
	C26H34O15
	C26H34O9
	C26H36O10
	C26H36O11
	C26H36O12
	C26H36O13
	C26H36O14
	C26H36O15
	C26H36O8
	C26H36O9
	C26H38O10
	C26H38O11
	C26H38O12
	C26H38O13
	C26H38O14
	C26H38O15
	C26H38O8
	C26H38O9
	C26H40O10
	C26H40O11
	C26H40O12
	C26H40O13
	C26H40O14
	C26H40O15
	C26H40O8
	C26H40O9
	C26H42O10
	C26H42O11
	C26H42O12
	C26H42O13
	C26H42O14
	C26H42O15
	C26H42O9
	C26H44O10
	C26H44O11
	C26H44O12
	C26H44O13
	C27H28O11
	C27H28O12
	C27H28O13
	C27H30O10
	C27H30O11
	C27H30O12
	C27H30O13
	C27H32O10
	C27H32O11
	C27H32O12
	C27H32O13
	C27H32O14
	C27H34O10
	C27H34O11
	C27H34O12
	C27H34O13
	C27H34O14
	C27H34O9
	C27H36O10
	C27H36O11
	C27H36O12
	C27H36O13
	C27H36O14
	C27H36O15
	C27H36O9
	C27H38O10
	C27H38O11
	C27H38O12
	C27H38O13
	C27H38O14
	C27H38O15
	C27H38O8
	C27H38O9
	C27H40O10
	C27H40O11
	C27H40O12
	C27H40O13
	C27H40O14
	C27H40O15
	C27H40O8
	C27H40O9
	C27H42O10
	C27H42O11
	C27H42O12
	C27H42O13
	C27H42O14
	C27H42O15
	C27H42O8
	C27H42O9
	C27H44O10
	C27H44O11
	C27H44O12
	C27H44O13
	C27H44O14
	C27H44O15
	C27H44O9
	C27H46O10
	C27H46O11
	C27H46O12
	C28H30O12
	C28H30O13
	C28H32O11
	C28H32O12
	C28H32O13
	C28H34O10
	C28H34O11
	C28H34O12
	C28H34O13
	C28H34O14
	C28H36O10
	C28H36O11
	C28H36O12
	C28H36O13
	C28H36O14
	C28H38O10
	C28H38O11
	C28H38O12
	C28H38O13
	C28H38O14
	C28H38O15
	C28H40O10
	C28H40O11
	C28H40O12
	C28H40O13
	C28H40O14
	C28H40O15
	C28H40O9
	C28H42O10
	C28H42O11
	C28H42O12
	C28H42O13
	C28H42O14
	C28H42O15
	C28H42O9
	C28H44O10
	C28H44O11
	C28H44O12
	C28H44O13
	C28H44O14
	C28H44O15
	C28H44O9
	C28H46O10
	C28H46O11
	C28H46O12
	C28H46O13
	C28H46O14
	C28H46O15
	C29H28O2
	C29H34O12
	C29H36O11
	C29H36O12
	C29H36O13
	C29H36O14
	C29H38O10
	C29H38O11
	C29H38O12
	C29H38O13
	C29H38O14
	C29H40O10
	C29H40O11
	C29H40O12
	C29H40O13
	C29H40O14
	C29H40O15
	C29H42O10
	C29H42O11
	C29H42O12
	C29H42O13
	C29H42O14
	C29H42O15
	C29H44O10
	C29H44O11
	C29H44O12
	C29H44O13
	C29H44O14
	C29H44O15
	C29H44O9
	C29H46O10
	C29H46O11
	C29H46O12
	C29H46O13
	C29H46O14
	C29H46O15
	C29H46O9
	C29H48O10
	C29H48O11
	C29H48O12
	C29H48O13
	C29H48O14
	C2H2O3
	C2H2O4
	C2H4O2
	C2H4O3
	C2H4O4
	C30H38O13
	C30H40O11
	C30H40O12
	C30H40O13
	C30H42O11
	C30H42O12
	C30H42O13
	C30H42O14
	C30H44O10
	C30H44O11
	C30H44O12
	C30H44O13
	C30H44O14
	C30H44O15
	C30H46O10
	C30H46O11
	C30H46O12
	C30H46O13
	C30H46O14
	C30H46O15
	C30H48O10
	C30H48O11
	C30H48O12
	C30H48O13
	C30H48O14
	C30H48O15
	C30H48O9
	C30H50O10
	C3H2O2
	C3H2O3
	C3H2O4
	C3H2O5
	C3H4O1
	C3H4O2
	C3H4O3
	C3H4O4
	C3H4O5
	C3H6O1
	C3H6O13
	C3H6O2
	C3H6O3
	C3H6O4
	C3H8O7
	C4H2O3
	C4H2O4
	C4H2O5
	C4H4O1
	C4H4O2
	C4H4O3
	C4H4O4
	C4H4O5
	C4H6O1
	C4H6O2
	C4H6O3
	C4H6O4
	C4H6O5
	C4H6O6
	C4H8O1
	C4H8O2
	C4H8O3
	C4H8O4
	C4H8O7
	C5H10O1
	C5H10O2
	C5H10O3
	C5H10O4
	C5H10O5
	C5H10O6
	C5H2O4
	C5H2O5
	C5H2O6
	C5H4O2
	C5H4O3
	C5H4O4
	C5H4O5
	C5H4O6
	C5H6O0
	C5H6O1
	C5H6O2
	C5H6O3
	C5H6O4
	C5H6O5
	C5H6O6
	C5H8O1
	C5H8O2
	C5H8O3
	C5H8O4
	C5H8O5
	C5H8O6
	C6H10O1
	C6H10O2
	C6H10O3
	C6H10O4
	C6H10O5
	C6H10O6
	C6H10O7
	C6H12O1
	C6H12O2
	C6H12O3
	C6H12O4
	C6H12O5
	C6H12O6
	C6H2O5
	C6H4O2
	C6H4O3
	C6H4O4
	C6H4O5
	C6H4O6
	C6H6O1
	C6H6O2
	C6H6O3
	C6H6O4
	C6H6O5
	C6H6O6
	C6H6O7
	C6H8O0
	C6H8O1
	C6H8O2
	C6H8O3
	C6H8O4
	C6H8O5
	C6H8O6
	C6H8O7
	C7H10O1
	C7H10O2
	C7H10O3
	C7H10O4
	C7H10O5
	C7H10O6
	C7H10O7
	C7H12O1
	C7H12O2
	C7H12O3
	C7H12O4
	C7H12O5
	C7H12O6
	C7H12O7
	C7H14O1
	C7H14O2
	C7H14O3
	C7H14O4
	C7H14O5
	C7H14O6
	C7H14O7
	C7H14O9
	C7H4O3
	C7H4O4
	C7H4O5
	C7H4O6
	C7H4O7
	C7H6O2
	C7H6O3
	C7H6O4
	C7H6O5
	C7H6O6
	C7H6O7
	C7H8O1
	C7H8O2
	C7H8O3
	C7H8O4
	C7H8O5
	C7H8O6
	C7H8O7
	C7H8O8
	C8H10O0
	C8H10O1
	C8H10O2
	C8H10O3
	C8H10O4
	C8H10O5
	C8H10O6
	C8H10O7
	C8H10O8
	C8H12O1
	C8H12O2
	C8H12O3
	C8H12O4
	C8H12O5
	C8H12O6
	C8H12O7
	C8H12O8
	C8H14O1
	C8H14O2
	C8H14O3
	C8H14O4
	C8H14O5
	C8H14O6
	C8H14O7
	C8H14O8
	C8H16O1
	C8H16O2
	C8H16O3
	C8H16O4
	C8H16O5
	C8H16O6
	C8H16O7
	C8H4O3
	C8H4O4
	C8H4O5
	C8H4O6
	C8H6O3
	C8H6O4
	C8H6O5
	C8H6O6
	C8H6O7
	C8H8O1
	C8H8O2
	C8H8O3
	C8H8O4
	C8H8O5
	C8H8O6
	C8H8O7
	C8H8O8
	C9H10O1
	C9H10O2
	C9H10O3
	C9H10O4
	C9H10O5
	C9H10O6
	C9H10O7
	C9H10O8
	C9H10O9
	C9H12O0
	C9H12O1
	C9H12O2
	C9H12O3
	C9H12O4
	C9H12O5
	C9H12O6
	C9H12O7
	C9H12O8
	C9H12O9
	C9H14O1
	C9H14O2
	C9H14O3
	C9H14O4
	C9H14O5
	C9H14O6
	C9H14O7
	C9H14O8
	C9H14O9
	C9H16O1
	C9H16O2
	C9H16O3
	C9H16O4
	C9H16O5
	C9H16O6
	C9H16O7
	C9H16O8
	C9H16O9
	C9H18O1
	C9H18O2
	C9H18O3
	C9H18O4
	C9H18O5
	C9H18O6
	C9H18O7
	C9H4O5
	C9H4O6
	C9H4O7
	C9H4O8
	C9H6O3
	C9H6O4
	C9H6O5
	C9H6O6
	C9H6O7
	C9H6O8
	C9H8O2
	C9H8O3
	C9H8O4
	C9H8O5
	C9H8O6
	C9H8O7
	C9H8O8
