# Supplementary material for: Autoxidation of terpenes, a common pathway in tropospheric and low temperature combustion conditions: the case of limonene and α-pinene
Source: Copernicus journal article supplement (doi:10.5194/acp-2021-964), 2021-12-02
Supplement: Supplementary file 2 [file acp-2021-964-supplement.zip]

Archive with 2 entries (2 files):
- Supplement Autoxidation of terpenes, a common pathway... Soumission ACP 191121B.pdf
- Supplement Autoxidation of terpenes, a common pathway... Soumission ACP 191121 Data S2.xlsx
